# Supplementary material for: RNA-seq identified a super-long intergenic transcript functioning in adipogenesis
Source: PubMed Central journal article supplement — RNA Biol. 2013 Apr 11;10(6):990–1001. doi: 10.4161/rna.24644 (PMC4111738; doi:10.4161/rna.24644), 2013-04-11
Supplement: rna-10-990-s01.pdf [file rna-10-990-s01.pdf]

## **Supplemental Material to:**

**Fan Yi, Feng Yang, Xiaoqiao Liu, Hongbo Chen, Ting Ji,  
Lixiang Jiang, Xiaoxia Wang, Zhangping Yang,  
Li-He Zhang, Xianfeng Ding, Zicai Liang and Quan Du**

**RNA-seq identified a super-long intergenic  
transcript functioning in adipogenesis**

**2013; 10(6)**

**<http://dx.doi.org/10.4161/rna.24644>**

**[www.landesbioscience.com/journals/rnabiology/article/24644/](http://www.landesbioscience.com/journals/rnabiology/article/24644/)**

# Yi\_Supplementary Fig S1

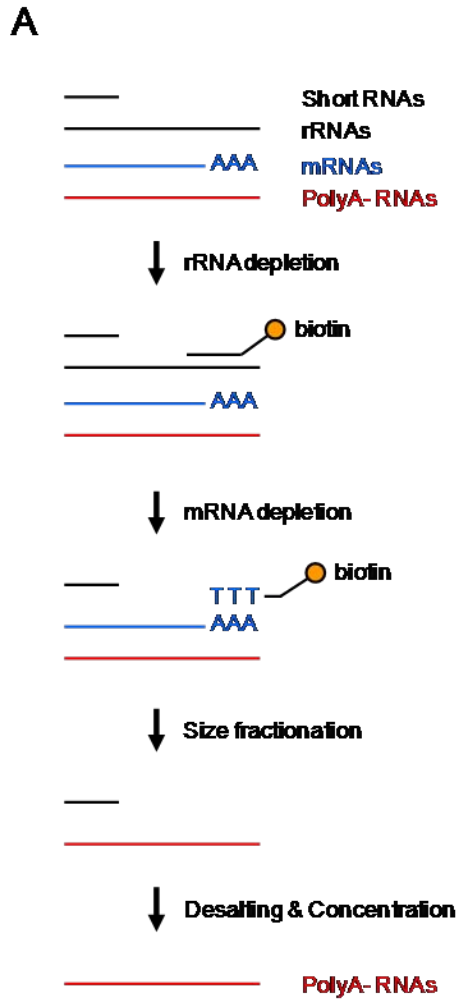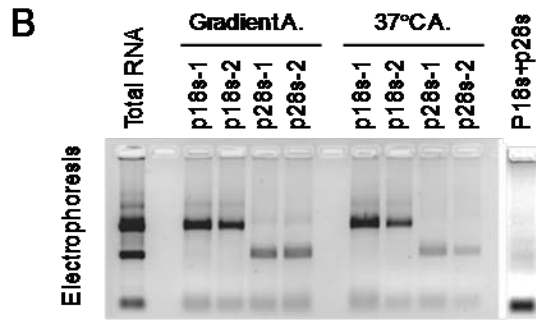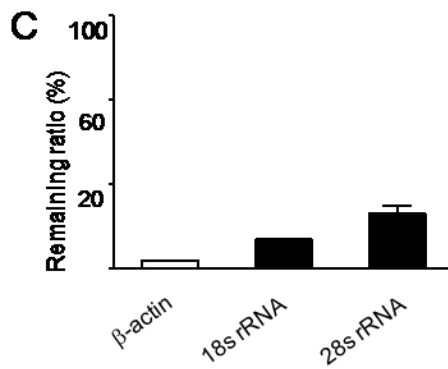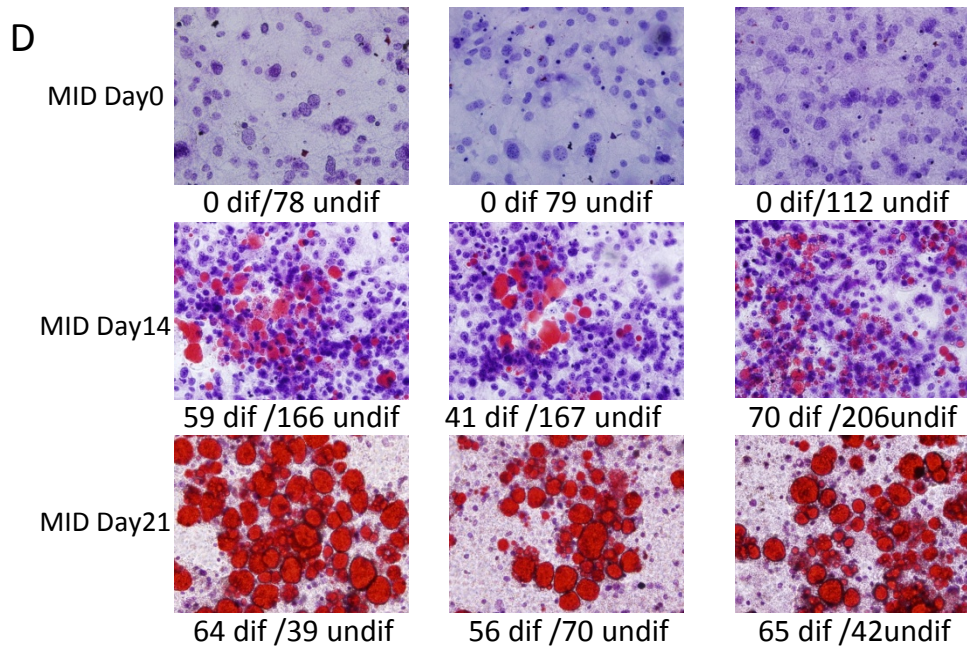

# Yi\_Supplementary Fig S2

A

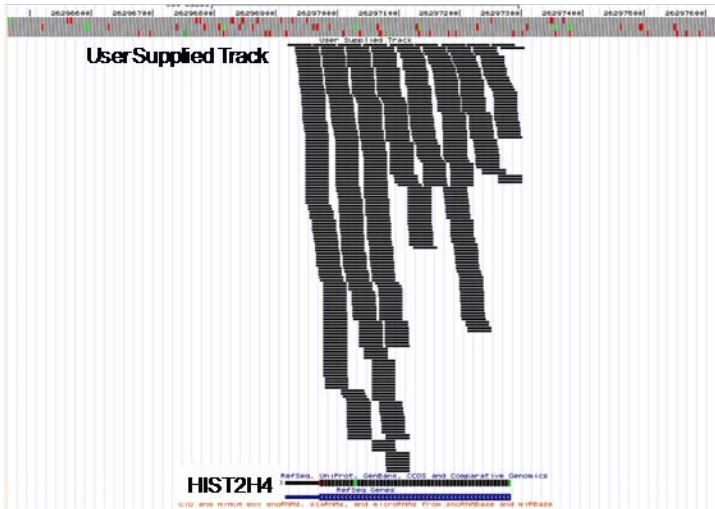

B

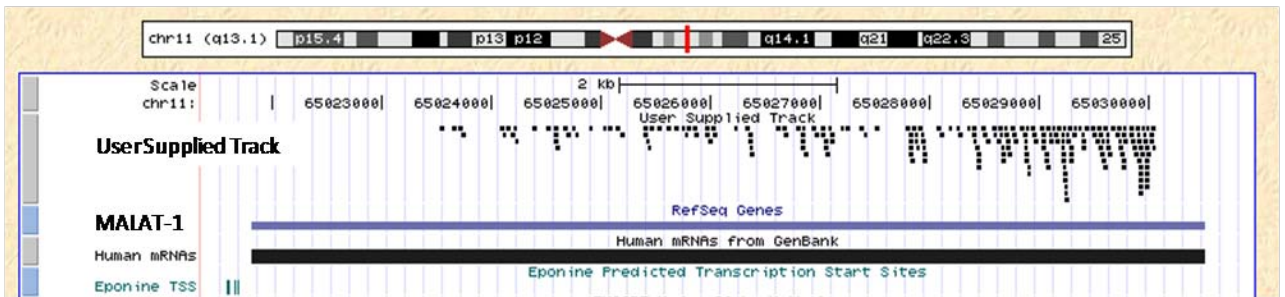

# Yi\_Supplementary Fig S3

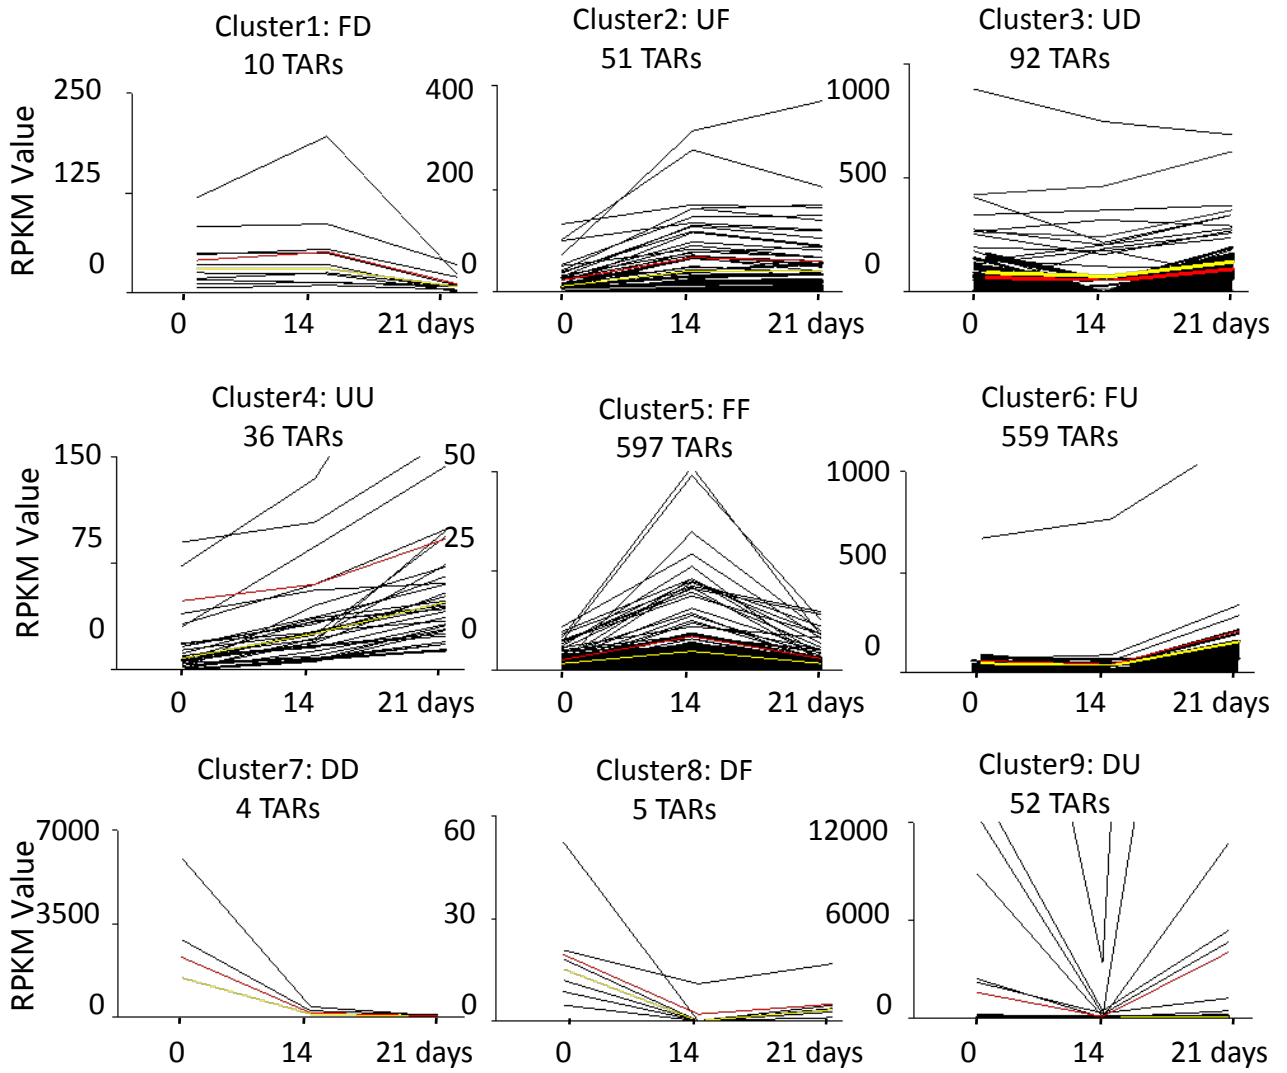

# Yi\_Supplementary Fig S4

slincRAD Expression Variation in Mice Tissues (dB/dB vs C57)

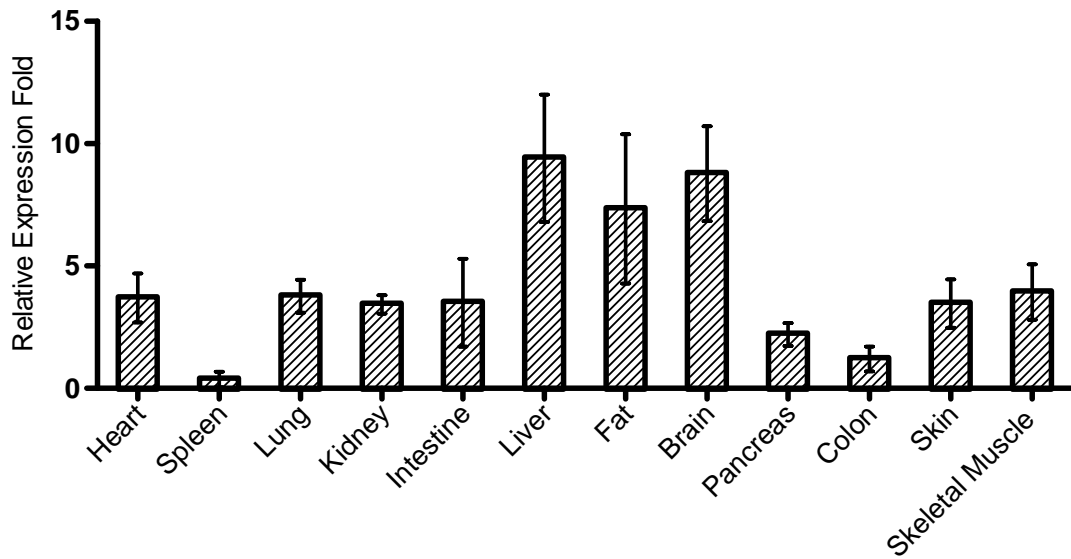

# Yi\_Supplementary Fig S5

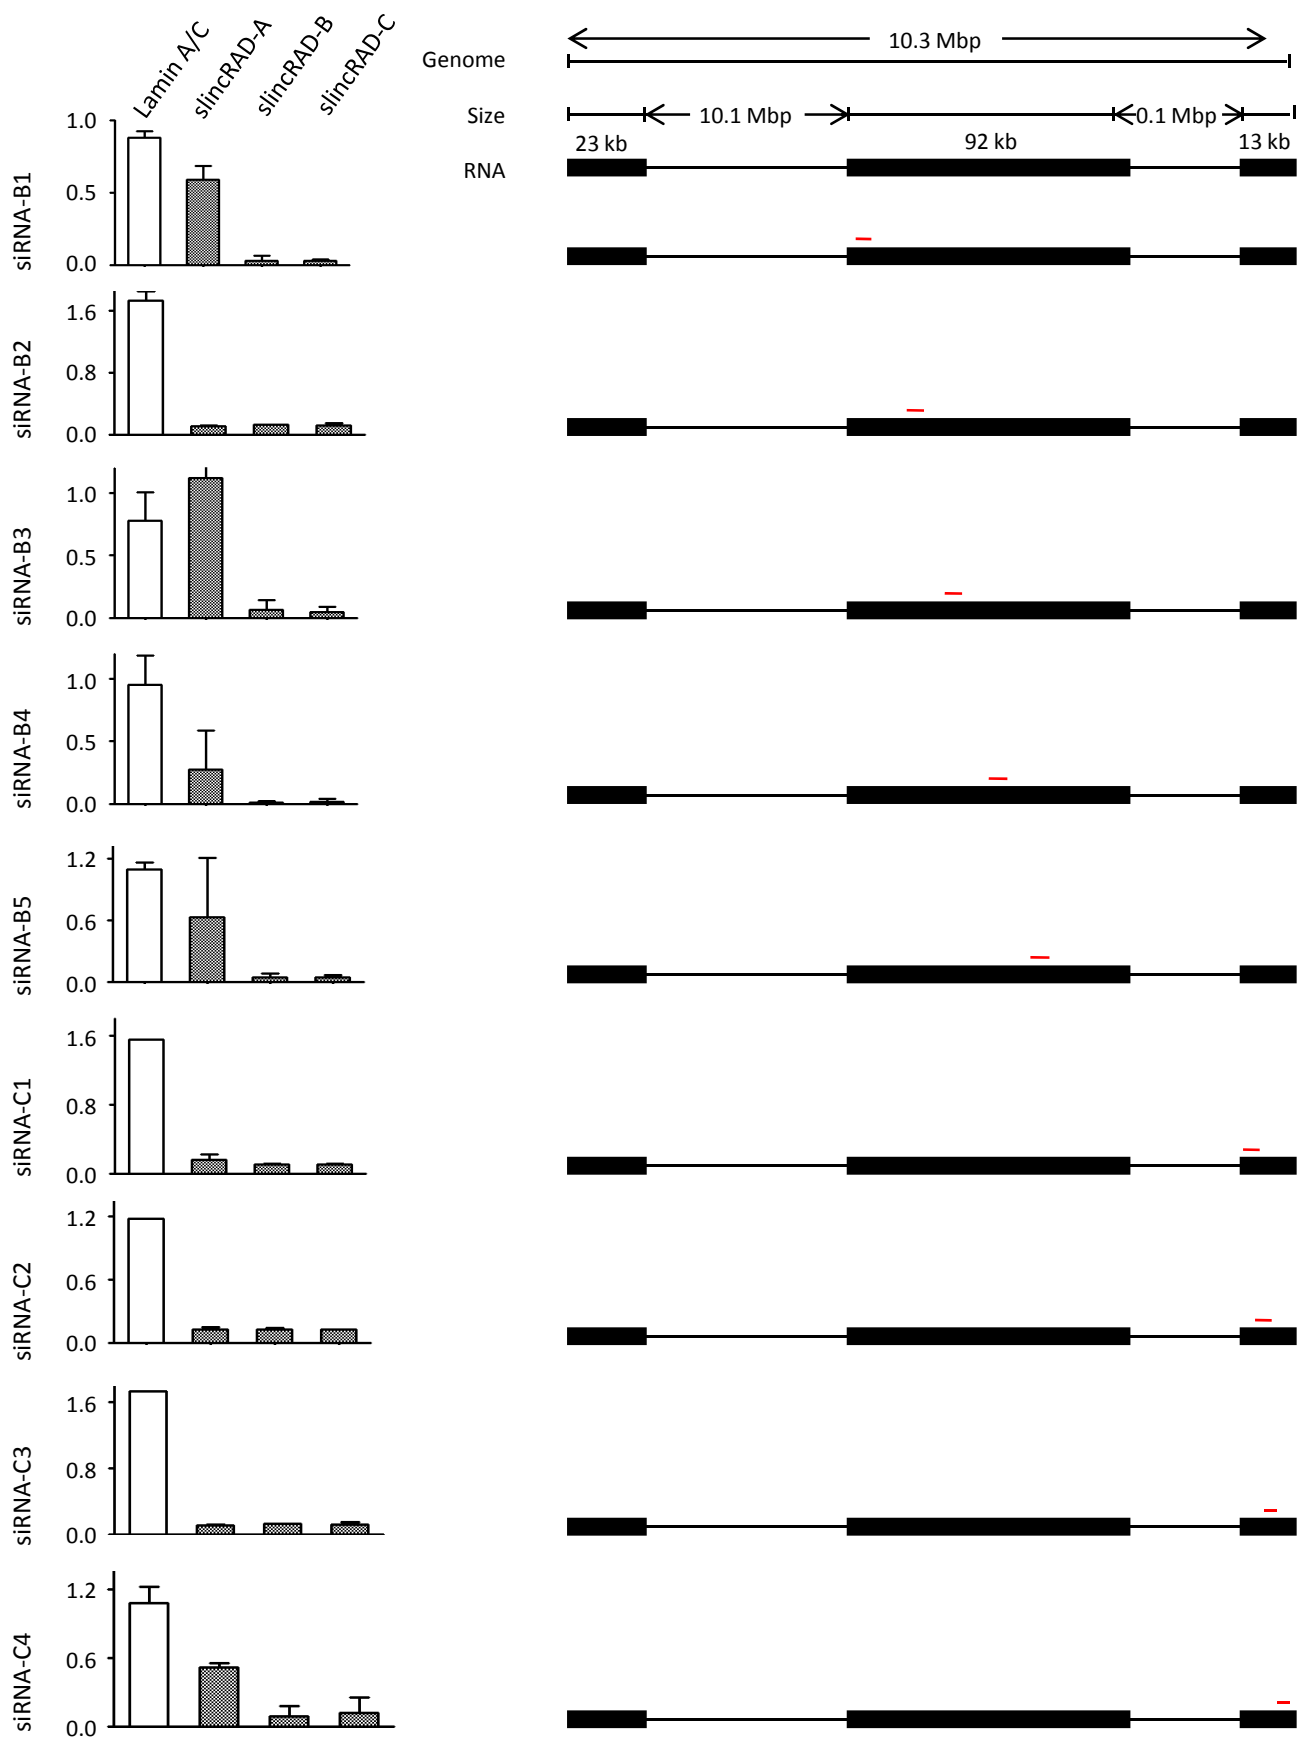

# Yi\_Supplementary Fig S6

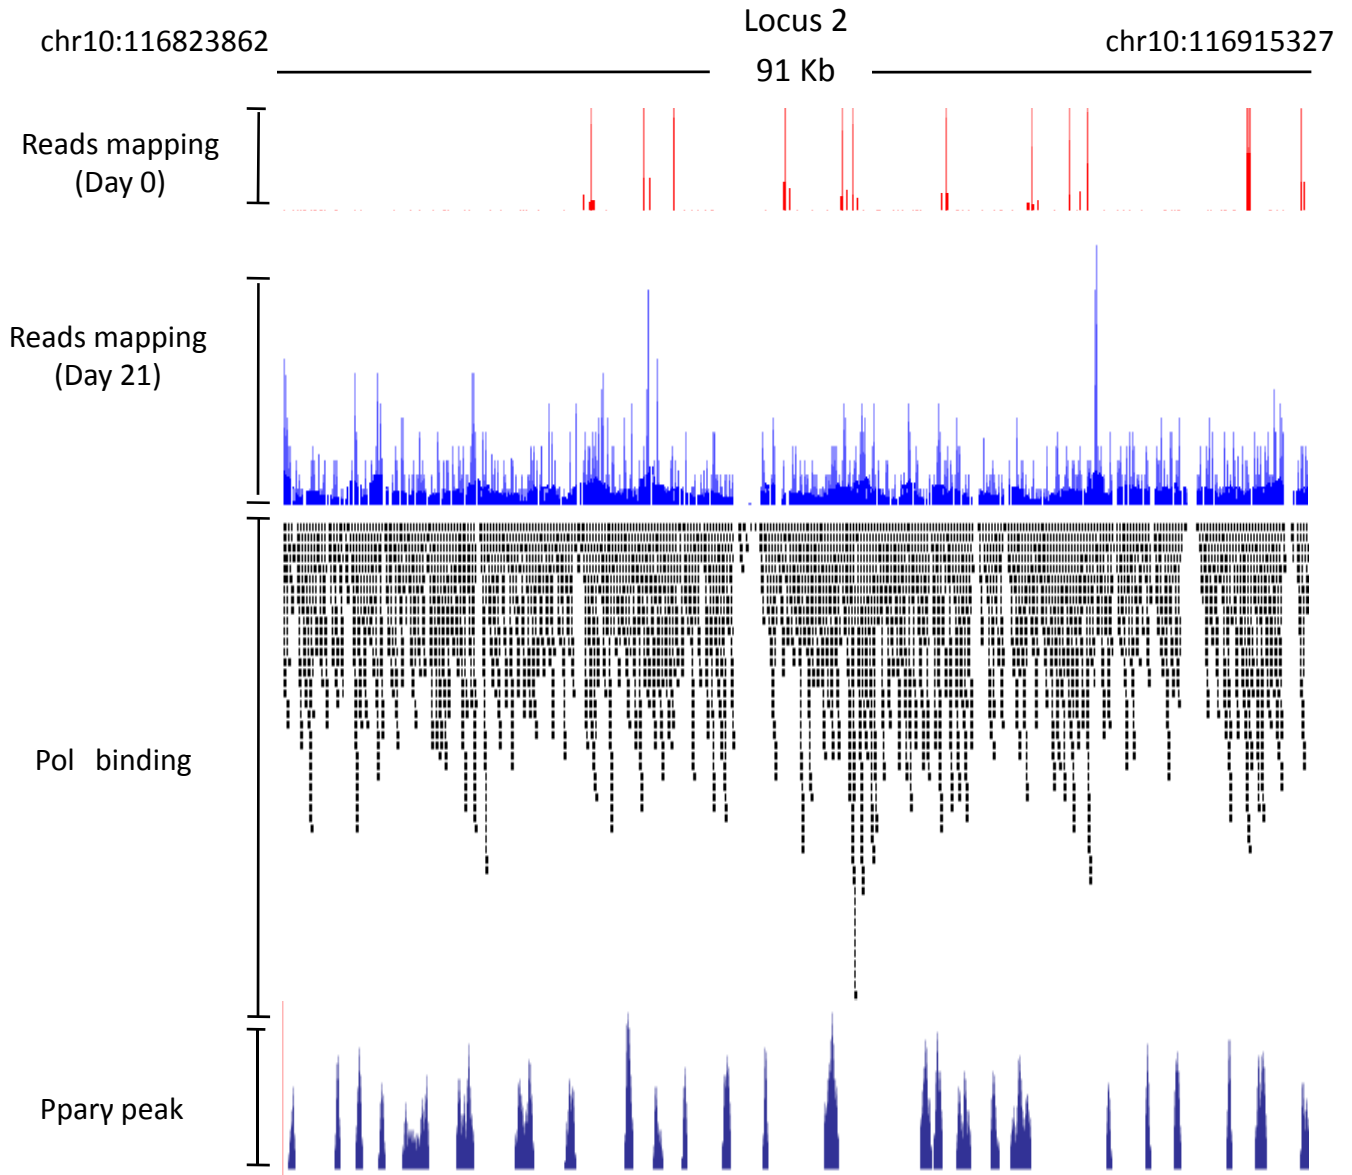

# Yi\_Supplementary Fig S7

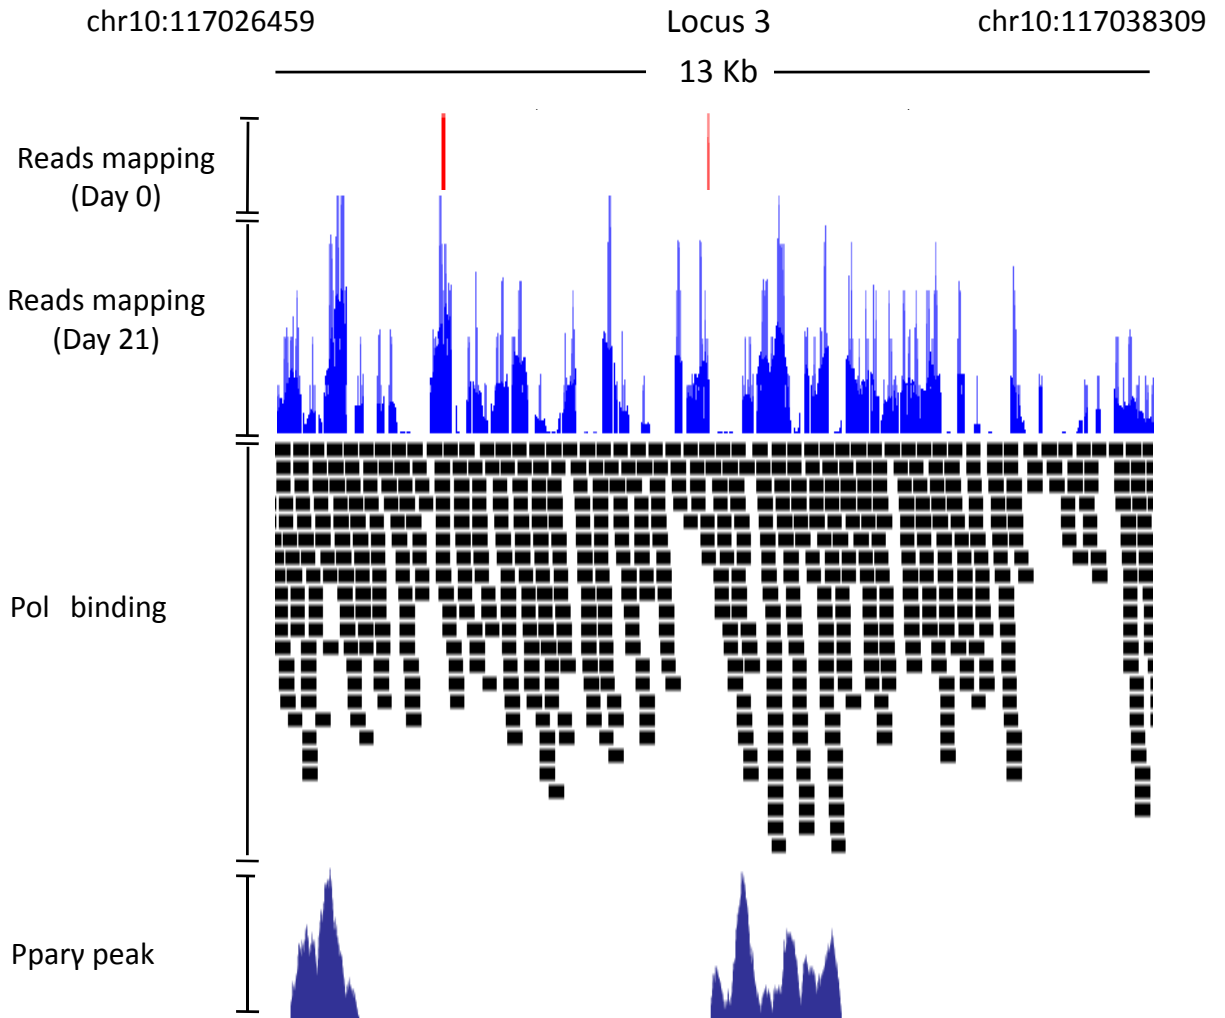



# Yi\_Supplementary Fig S8

Control  
Average cell number: 601

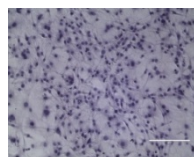

Cell number: 608

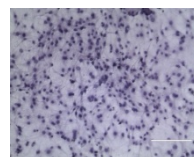

Cell number: 620

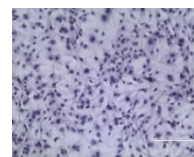

Cell number: 575

Mock  
Average cell number: 728

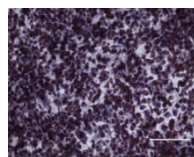

Cell number: 720

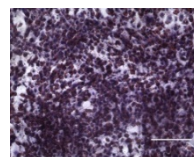

Cell number: 704

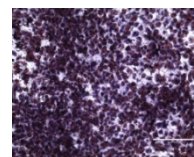

Cell number: 760

NC-siRNA  
Average cell number: 802

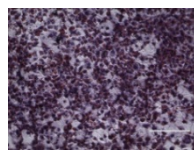

Cell number: 812

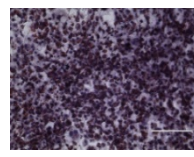

Cell number: 800

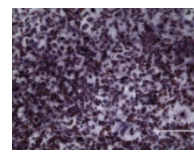

Cell number: 796

siRNA2  
Average cell number: 764

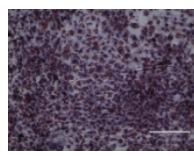

Cell number: 776

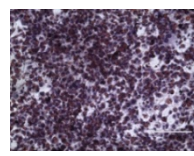

Cell number: 736

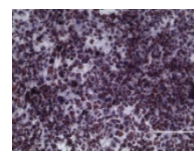

Cell number: 780

siRNA9  
Average cell number: 718

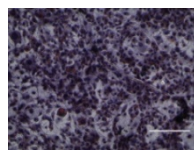

Cell number: 716

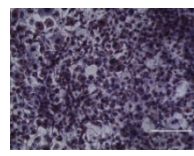

Cell number: 732

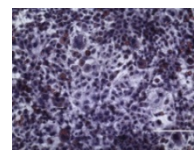

Cell number: 708

siRNA12  
Average cell number: 766

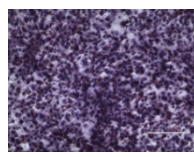

Cell number: 760

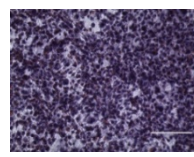

Cell number: 800

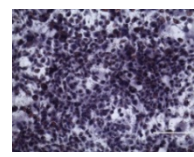

Cell number: 740

siRNA14  
Average cell number: 863

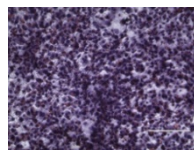

Cell number: 868

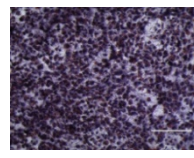

Cell number: 883

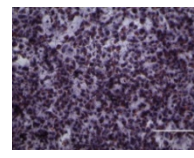

Cell number: 840

siRNA 15  
Average cell number: 845

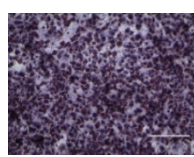

Cell number: 872

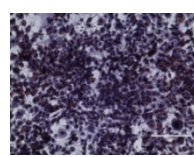

Cell number: 804

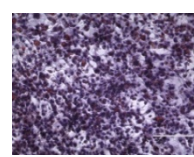

Cell number: 860

siRNA 17  
Average cell number: 832

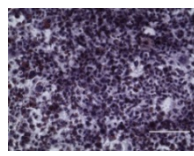

Cell number: 804

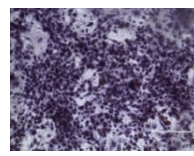

Cell number: 850

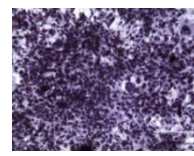

Cell number: 832

# Yi\_Supplementary Fig S9

A Expression change of slincRAD after MID

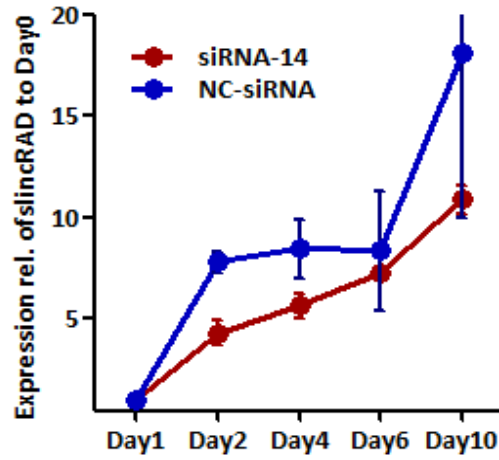

B Expression change of PPARG after MID

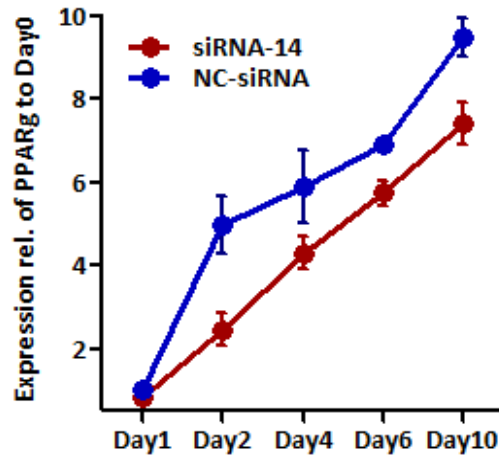

# Yi\_Supplementary Fig S10

chr10:116540317

823 Kb

chr10:117363510

Reads Mapping  
(Day 21)

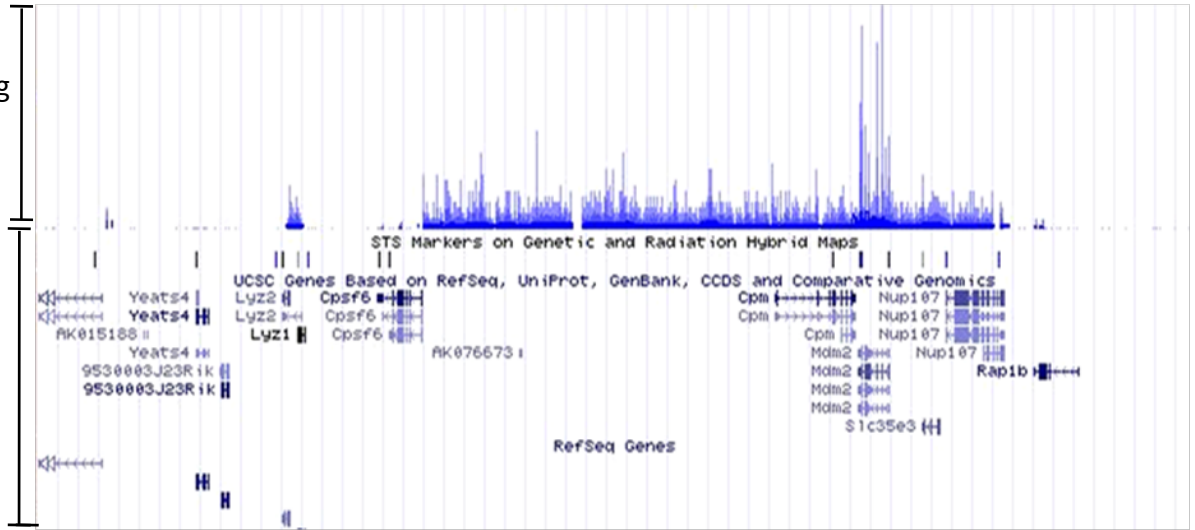

Neighbor  
Genes  
Flanking  
slnRAD In  
Mice Genome

Chr12: 69023949

1044 Kb

Chr12: 70068578

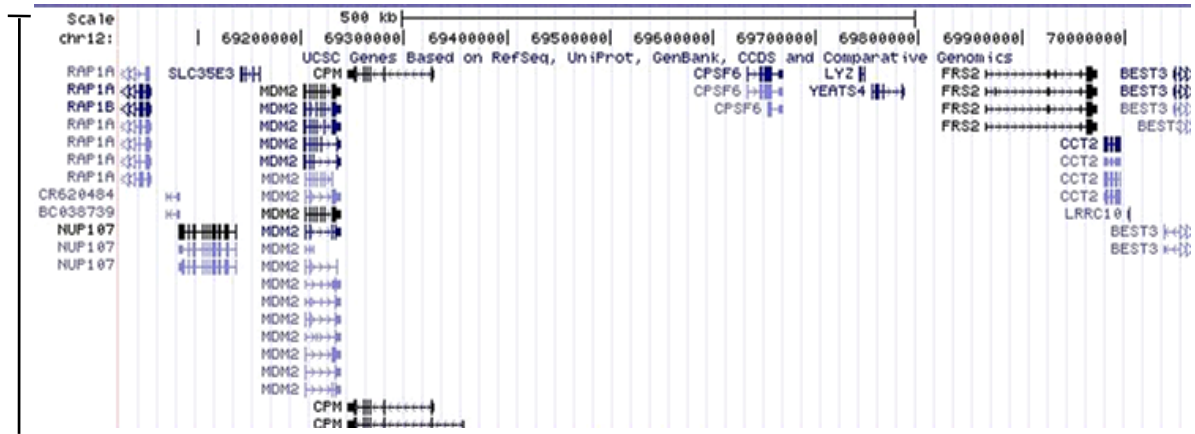

Homologs Of  
slnRAD-  
neighbor-  
genes In  
Human  
Genome

|    | Annotation by<br>TARs | Annotation for<br>sincRAD | Genome localization (mm9) | expression<br>change |
|----|-----------------------|---------------------------|---------------------------|----------------------|
| 1  | TAR-1                 |                           | chr1:4678698-4679294      | ud                   |
| 2  | TAR-2                 |                           | chr1:6906633-6907074      | ud                   |
| 3  | TAR-3                 |                           | chr1:29541311-29542767    | ud                   |
| 4  | TAR-4                 |                           | chr1:33157740-33157975    | du                   |
| 5  | TAR-5                 |                           | chr1:43944831-43945447    | ud                   |
| 6  | TAR-6                 |                           | chr1:43945599-43945956    | du                   |
| 7  | TAR-7                 |                           | chr1:44520708-44521082    | du                   |
| 8  | TAR-8                 |                           | chr1:46471321-46471641    | ud                   |
| 9  | TAR-9                 |                           | chr1:72134680-72134980    | ff                   |
| 10 | TAR-10                |                           | chr1:72610794-72611096    | uu                   |
| 11 | TAR-11                |                           | chr1:81793862-81794309    | ud                   |
| 12 | TAR-12                |                           | chr1:84971840-84972797    | du                   |
| 13 | TAR-13                |                           | chr1:84973028-84973446    | du                   |
| 14 | TAR-14                |                           | chr1:84975483-84976431    | fu                   |
| 15 | TAR-15                |                           | chr1:84978715-84979493    | fu                   |
| 16 | TAR-16                |                           | chr1:84980972-84981462    | fu                   |
| 17 | TAR-17                |                           | chr1:87350904-87351431    | du                   |
| 18 | TAR-18                |                           | chr1:87354763-87355658    | fu                   |
| 19 | TAR-19                |                           | chr1:87355929-87356826    | fu                   |
| 20 | TAR-20                |                           | chr1:87357707-87358506    | fu                   |
| 21 | TAR-21                |                           | chr1:87359587-87360541    | fu                   |
| 22 | TAR-22                |                           | chr1:87385394-87387451    | fu                   |
| 23 | TAR-23                |                           | chr1:87389657-87390146    | fu                   |
| 24 | TAR-24                |                           | chr1:87391444-87391970    | fu                   |
| 25 | TAR-25                |                           | chr1:87392368-87392855    | fu                   |
| 26 | TAR-26                |                           | chr1:87398108-87398699    | fu                   |
| 27 | TAR-27                |                           | chr1:87399402-87400061    | fu                   |
| 28 | TAR-28                |                           | chr1:100673956-100674316  | uu                   |
| 29 | TAR-29                |                           | chr1:101086264-101086647  | du                   |
| 30 | TAR-30                |                           | chr1:107354734-107355399  | fu                   |
| 31 | TAR-31                |                           | chr1:111730574-111731315  | du                   |
| 32 | TAR-32                |                           | chr1:130416345-130418054  | uf                   |
| 33 | TAR-33                |                           | chr1:135491114-135492632  | d                    |
| 34 | TAR-34                |                           | chr1:144990109-144991181  | uf                   |
| 35 | TAR-35                |                           | chr1:156054146-156055588  | ff                   |
| 36 | TAR-36                |                           | chr1:158456414-158456915  | du                   |
| 37 | TAR-37                |                           | chr1:165554251-165554811  | ud                   |
| 38 | TAR-38                |                           | chr1:172561057-172561506  | uf                   |
| 39 | TAR-39                |                           | chr1:180229519-180230463  | uf                   |
| 40 | TAR-40                |                           | chr10:21755990-21756369   | du                   |
| 41 | TAR-41                |                           | chr10:24774416-24774800   | ff                   |

|    |        |                          |                           |    |
|----|--------|--------------------------|---------------------------|----|
| 42 | TAR-42 |                          | chr10:25827582-25828062   | uf |
| 43 | TAR-43 |                          | chr10:28749902-28750994   | ud |
| 44 | TAR-44 |                          | chr10:38918273-38919077   | uf |
| 45 | TAR-45 |                          | chr10:44572413-44573050   | ff |
| 46 | TAR-46 |                          | chr10:45595104-45595783   | ud |
| 47 | TAR-47 |                          | chr10:56216983-56218012   | uu |
| 48 | TAR-48 |                          | chr10:57688112-57688832   | fu |
| 49 | TAR-49 |                          | chr10:59334163-59334418   | ud |
| 50 | TAR-50 |                          | chr10:64997704-64998076   | ud |
| 51 | TAR-51 |                          | chr10:68787854-68788386   | uf |
| 52 | TAR-52 |                          | chr10:77115642-77115948   | ud |
| 53 | TAR-53 |                          | chr10:83771603-83772083   | uu |
| 54 | TAR-54 |                          | chr10:95540156-95540539   | du |
| 55 | TAR-55 |                          | chr10:106650313-106650828 | fu |
| 56 | TAR-56 |                          | chr10:106651025-106651633 | fu |
| 57 | TAR-57 |                          | chr10:106651848-106653275 | fu |
| 58 | TAR-58 |                          | chr10:106653446-106654303 | fu |
| 59 | TAR-59 | slincRAD-A <sub>1</sub>  | chr10:106655085-106661062 | fu |
| 60 | TAR-60 | slincRAD-A <sub>2</sub>  | chr10:106661666-106663342 | fu |
| 61 | TAR-61 | slincRAD-A <sub>3</sub>  | chr10:106664977-106670736 | fu |
| 62 | TAR-62 | slincRAD-A <sub>4</sub>  | chr10:106670951-106671974 | fu |
| 63 | TAR-63 | slincRAD-A <sub>5</sub>  | chr10:106672169-106673679 | fu |
| 64 | TAR-64 | slincRAD-A <sub>6</sub>  | chr10:106673914-106674603 | fu |
| 65 | TAR-65 | slincRAD-A <sub>7</sub>  | chr10:106674801-106676053 | fu |
| 66 | TAR-66 | slincRAD-A <sub>8</sub>  | chr10:106676228-106678924 | fu |
| 67 | TAR-67 | slincRAD-A <sub>9</sub>  | chr10:106680022-106683538 | fu |
| 68 | TAR-68 | slincRAD-A <sub>10</sub> | chr10:106683752-106687072 | fu |
| 69 | TAR-69 | slincRAD-A <sub>11</sub> | chr10:106687256-106688743 | fu |
| 70 | TAR-70 |                          | chr10:106688921-106690482 | fu |
| 71 | TAR-71 |                          | chr10:106692059-106693048 | fu |
| 72 | TAR-72 |                          | chr10:106693302-106693954 | fu |
| 73 | TAR-73 |                          | chr10:106886561-106887333 | fu |
| 74 | TAR-74 |                          | chr10:115036065-115036818 | ff |
| 75 | TAR-75 |                          | chr10:116711686-116712062 | fu |
| 76 | TAR-76 |                          | chr10:116818297-116818767 | fu |
| 77 | TAR-77 |                          | chr10:116819259-116820997 | fu |
| 78 | TAR-78 |                          | chr10:116822010-116822328 | fu |
| 79 | TAR-79 | slincRAD-B <sub>1</sub>  | chr10:116823211-116825934 | fu |
| 80 | TAR-80 | slincRAD-B <sub>2</sub>  | chr10:116826128-116827815 | fu |
| 81 | TAR-81 | slincRAD-B <sub>3</sub>  | chr10:116828032-116829384 | fu |
| 82 | TAR-82 | slincRAD-B <sub>4</sub>  | chr10:116829936-116830705 | fu |

|     |         |                          |                           |    |
|-----|---------|--------------------------|---------------------------|----|
| 83  | TAR-83  | slincRAD-B <sub>5</sub>  | chr10:116830907-116831831 | fu |
| 84  | TAR-84  | slincRAD-B <sub>6</sub>  | chr10:116831993-116832656 | fu |
| 85  | TAR-85  | slincRAD-B <sub>7</sub>  | chr10:116833517-116834147 | fu |
| 86  | TAR-86  | slincRAD-B <sub>8</sub>  | chr10:116834298-116834771 | fu |
| 87  | TAR-87  | slincRAD-B <sub>9</sub>  | chr10:116834953-116836510 | fu |
| 88  | TAR-88  | slincRAD-B <sub>10</sub> | chr10:116836674-116838720 | fu |
| 89  | TAR-89  | slincRAD-B <sub>11</sub> | chr10:116838888-116839971 | fu |
| 90  | TAR-90  | slincRAD-B <sub>12</sub> | chr10:116840168-116841203 | fu |
| 91  | TAR-91  | slincRAD-B <sub>13</sub> | chr10:116841385-116841951 | fu |
| 92  | TAR-92  | slincRAD-B <sub>14</sub> | chr10:116842104-116848433 | fu |
| 93  | TAR-93  | slincRAD-B <sub>15</sub> | chr10:116848646-116849682 | fu |
| 94  | TAR-94  | slincRAD-B <sub>16</sub> | chr10:116850352-116853553 | fu |
| 95  | TAR-95  | slincRAD-B <sub>17</sub> | chr10:116854128-116856605 | fu |
| 96  | TAR-96  | slincRAD-B <sub>18</sub> | chr10:116856785-116859083 | fu |
| 97  | TAR-97  | slincRAD-B <sub>19</sub> | chr10:116859385-116859984 | fu |
| 98  | TAR-98  | slincRAD-B <sub>20</sub> | chr10:116860183-116861843 | fu |
| 99  | TAR-99  | slincRAD-B <sub>21</sub> | chr10:116862043-116864259 | fu |
| 100 | TAR-100 | slincRAD-B <sub>22</sub> | chr10:116866583-116867167 | fu |
| 101 | TAR-101 | slincRAD-B <sub>23</sub> | chr10:116867345-116867741 | fu |
| 102 | TAR-102 | slincRAD-B <sub>24</sub> | chr10:116868332-116868602 | du |
| 103 | TAR-103 | slincRAD-B <sub>25</sub> | chr10:116868781-116870397 | fu |
| 104 | TAR-104 | slincRAD-B <sub>26</sub> | chr10:116870548-116877936 | fu |
| 105 | TAR-105 | slincRAD-B <sub>27</sub> | chr10:116878116-116879472 | fu |
| 106 | TAR-106 | slincRAD-B <sub>28</sub> | chr10:116886526-116888071 | fu |
| 107 | TAR-107 | slincRAD-B <sub>29</sub> | chr10:116888468-116889057 | fu |
| 108 | TAR-108 | slincRAD-B <sub>30</sub> | chr10:116889218-116891543 | fu |
| 109 | TAR-109 | slincRAD-B <sub>31</sub> | chr10:116891746-116893028 | fu |
| 110 | TAR-110 | slincRAD-B <sub>32</sub> | chr10:116893227-116895091 | fu |
| 111 | TAR-111 | slincRAD-B <sub>33</sub> | chr10:116895381-116897862 | fu |
| 112 | TAR-112 | slincRAD-B <sub>34</sub> | chr10:116898078-116901093 | fu |
| 113 | TAR-113 | slincRAD-B <sub>35</sub> | chr10:116901707-116903927 | fu |
| 114 | TAR-114 | slincRAD-B <sub>36</sub> | chr10:116906102-116906839 | fu |
| 115 | TAR-115 | slincRAD-B <sub>37</sub> | chr10:116907037-116910175 | fu |
| 116 | TAR-116 | slincRAD-B <sub>38</sub> | chr10:116910367-116913088 | fu |
| 117 | TAR-117 |                          | chr10:116914269-116917904 | fu |
| 118 | TAR-118 |                          | chr10:116918121-116919065 | fu |
| 119 | TAR-119 |                          | chr10:116919225-116920710 | fu |
| 120 | TAR-120 |                          | chr10:116927855-116929570 | fu |
| 121 | TAR-121 |                          | chr10:116930146-116932179 | fu |

|     |         |                         |                           |    |
|-----|---------|-------------------------|---------------------------|----|
| 122 | TAR-122 |                         | chr10:116932921-116934255 | fu |
| 123 | TAR-123 |                         | chr10:116934411-116935914 | fu |
| 124 | TAR-124 |                         | chr10:116936075-116939635 | du |
| 125 | TAR-125 |                         | chr10:116939826-116940194 | du |
| 126 | TAR-126 |                         | chr10:116940350-116942990 | fu |
| 127 | TAR-127 |                         | chr10:116943195-116944077 | fu |
| 128 | TAR-128 |                         | chr10:116944247-116951462 | fu |
| 129 | TAR-129 |                         | chr10:116951770-116953028 | fu |
| 130 | TAR-130 |                         | chr10:116953279-116954833 | fu |
| 131 | TAR-131 |                         | chr10:116955050-116958996 | fu |
| 132 | TAR-132 |                         | chr10:116959387-116960832 | fu |
| 133 | TAR-133 |                         | chr10:116961002-116961809 | fu |
| 134 | TAR-134 |                         | chr10:116962050-116964718 | fu |
| 135 | TAR-135 |                         | chr10:116964880-116966895 | fu |
| 136 | TAR-136 |                         | chr10:116967106-116967713 | fu |
| 137 | TAR-137 |                         | chr10:116967954-116973166 | fu |
| 138 | TAR-138 |                         | chr10:116973455-116978341 | fu |
| 139 | TAR-139 |                         | chr10:116978499-116982456 | fu |
| 140 | TAR-140 |                         | chr10:116982611-116986523 | fu |
| 141 | TAR-141 |                         | chr10:116986714-116987678 | fu |
| 142 | TAR-142 |                         | chr10:116987853-116990078 | fu |
| 143 | TAR-143 |                         | chr10:116990258-116991123 | fu |
| 144 | TAR-144 |                         | chr10:116991277-116992797 | fu |
| 145 | TAR-145 |                         | chr10:116993128-116995822 | fu |
| 146 | TAR-146 |                         | chr10:116995993-116996639 | fu |
| 147 | TAR-147 |                         | chr10:116996806-116999098 | fu |
| 148 | TAR-148 |                         | chr10:116999333-117001975 | fu |
| 149 | TAR-149 |                         | chr10:117002167-117002490 | fu |
| 150 | TAR-150 |                         | chr10:117002643-117008759 | fu |
| 151 | TAR-151 |                         | chr10:117008997-117010719 | fu |
| 152 | TAR-152 |                         | chr10:117011343-117011648 | fu |
| 153 | TAR-153 |                         | chr10:117011852-117013982 | fu |
| 154 | TAR-154 |                         | chr10:117014194-117017117 | fu |
| 155 | TAR-155 |                         | chr10:117017308-117018750 | fu |
| 156 | TAR-156 |                         | chr10:117018921-117021039 | fu |
| 157 | TAR-157 | slincRAD-C <sub>1</sub> | chr10:117021234-117025056 | fu |
| 158 | TAR-158 | slincRAD-C <sub>2</sub> | chr10:117036752-117037570 | fu |
| 159 | TAR-159 | slincRAD-C <sub>3</sub> | chr10:117037766-117038309 | fu |
| 160 | TAR-160 | slincRAD-C <sub>4</sub> | chr10:117038470-117038859 | du |
| 161 | TAR-161 |                         | chr10:117039424-117042161 | fu |
| 162 | TAR-162 |                         | chr10:117042351-117042902 | fu |
| 163 | TAR-163 |                         | chr10:117043455-117050645 | fu |

|     |         |                           |    |
|-----|---------|---------------------------|----|
| 164 | TAR-164 | chr10:117050865-117051801 | fu |
| 165 | TAR-165 | chr10:117051972-117054118 | fu |
| 166 | TAR-166 | chr10:117054640-117055087 | fu |
| 167 | TAR-167 | chr10:117055538-117059315 | fu |
| 168 | TAR-168 | chr10:117059477-117059835 | fu |
| 169 | TAR-169 | chr10:117060244-117061054 | fu |
| 170 | TAR-170 | chr10:117061225-117063578 | fu |
| 171 | TAR-171 | chr10:117063898-117065024 | fu |
| 172 | TAR-172 | chr10:117150285-117150766 | fu |
| 173 | TAR-173 | chr10:117151323-117153931 | fu |
| 174 | TAR-174 | chr10:117154376-117155366 | fu |
| 175 | TAR-175 | chr10:117155799-117157434 | fu |
| 176 | TAR-176 | chr10:117157841-117158312 | du |
| 177 | TAR-177 | chr10:117158536-117159211 | fu |
| 178 | TAR-178 | chr10:117159426-117162556 | fu |
| 179 | TAR-179 | chr10:117162812-117163426 | fu |
| 180 | TAR-180 | chr10:117164275-117165006 | fu |
| 181 | TAR-181 | chr10:117165626-117166216 | fu |
| 182 | TAR-182 | chr10:117166459-117167758 | fu |
| 183 | TAR-183 | chr10:117168078-117169096 | fu |
| 184 | TAR-184 | chr10:118048190-118053760 | fu |
| 185 | TAR-185 | chr10:118054111-118055222 | fu |
| 186 | TAR-186 | chr10:118055375-118056418 | fu |
| 187 | TAR-187 | chr10:118056623-118057517 | fu |
| 188 | TAR-188 | chr10:118057703-118058111 | fu |
| 189 | TAR-189 | chr10:118058594-118060320 | fu |
| 190 | TAR-190 | chr11:3000404-3000670     | du |
| 191 | TAR-191 | chr11:3000953-3001346     | fu |
| 192 | TAR-192 | chr11:3002041-3002534     | fu |
| 193 | TAR-193 | chr11:3004493-3004964     | du |
| 194 | TAR-194 | chr11:6371666-6372284     | fu |
| 195 | TAR-195 | chr11:20014432-20015079   | fu |
| 196 | TAR-196 | chr11:35524913-35525491   | ud |
| 197 | TAR-197 | chr11:103934093-103934435 | dd |
| 198 | TAR-198 | chr12:3109866-3110120     | du |
| 199 | TAR-199 | chr12:4593941-4594401     | uf |
| 200 | TAR-200 | chr12:10160131-10160510   | ff |
| 201 | TAR-201 | chr12:10162775-10163356   | uf |
| 202 | TAR-202 | chr12:17240405-17240860   | uf |
| 203 | TAR-203 | chr12:19058107-19058960   | fu |
| 204 | TAR-204 | chr12:20205594-20206333   | fu |
| 205 | TAR-205 | chr12:20278517-20279141   | fu |
| 206 | TAR-206 | chr12:23778228-23779576   | fu |



|     |         |                           |    |
|-----|---------|---------------------------|----|
| 207 | TAR-207 | chr12:24103022-24104370   | ff |
| 208 | TAR-208 | chr12:24588007-24588267   | ud |
| 209 | TAR-209 | chr12:27170910-27171700   | ff |
| 210 | TAR-210 | chr12:31703046-31703358   | ud |
| 211 | TAR-211 | chr12:31703540-31703987   | uf |
| 212 | TAR-212 | chr12:31704216-31704752   | ud |
| 213 | TAR-213 | chr12:37102723-37104072   | uf |
| 214 | TAR-214 | chr12:37104244-37104999   | fu |
| 215 | TAR-215 | chr12:37542835-37543223   | du |
| 216 | TAR-216 | chr12:40675150-40675459   | du |
| 217 | TAR-217 | chr12:48913921-48914284   | ud |
| 218 | TAR-218 | chr12:50877078-50877789   | du |
| 219 | TAR-219 | chr12:52234504-52235995   | fd |
| 220 | TAR-220 | chr12:55723591-55724118   | ud |
| 221 | TAR-221 | chr12:75904893-75905492   | du |
| 222 | TAR-222 | chr12:81881130-81881444   | ud |
| 223 | TAR-223 | chr12:86781612-86781964   | ud |
| 224 | TAR-224 | chr12:98299636-98300002   | du |
| 225 | TAR-225 | chr12:101982755-101983134 | uf |
| 226 | TAR-226 | chr12:109952187-109952891 | ff |
| 227 | TAR-227 | chr12:111132604-111133290 | ff |
| 228 | TAR-228 | chr12:113535507-113536176 | ff |
| 229 | TAR-229 | chr13:3138958-3139339     | ud |
| 230 | TAR-230 | chr13:3298122-3299000     | uf |
| 231 | TAR-231 | chr13:8127326-8127801     | uu |
| 232 | TAR-232 | chr13:8128287-8129120     | fu |
| 233 | TAR-233 | chr13:13414160-13414458   | du |
| 234 | TAR-234 | chr13:13982658-13984526   | fu |
| 235 | TAR-235 | chr13:15210728-15211697   | uf |
| 236 | TAR-236 | chr13:23517273-23517514   | ud |
| 237 | TAR-237 | chr13:44409268-44409807   | fu |
| 238 | TAR-238 | chr13:51045753-51046295   | ud |
| 239 | TAR-239 | chr13:61788701-61789188   | fu |
| 240 | TAR-240 | chr13:64725397-64725795   | fu |
| 241 | TAR-241 | chr13:64804472-64804873   | fu |
| 242 | TAR-242 | chr13:65015487-65015847   | fu |
| 243 | TAR-243 | chr13:65029978-65030475   | fu |
| 244 | TAR-244 | chr13:65435636-65436077   | ff |
| 245 | TAR-245 | chr13:65442496-65442921   | ff |
| 246 | TAR-246 | chr13:65446654-65447185   | fu |
| 247 | TAR-247 | chr13:66013560-66014292   | fu |
| 248 | TAR-248 | chr13:66040822-66041509   | fu |
| 249 | TAR-249 | chr13:66052110-66052629   | fu |

|     |         |                           |    |
|-----|---------|---------------------------|----|
| 250 | TAR-250 | chr13:66056364-66056871   | fu |
| 251 | TAR-251 | chr13:66062914-66063775   | fu |
| 252 | TAR-252 | chr13:66096816-66097518   | fu |
| 253 | TAR-253 | chr13:66105956-66107231   | fu |
| 254 | TAR-254 | chr13:66122132-66122901   | ff |
| 255 | TAR-255 | chr13:66128648-66129779   | ff |
| 256 | TAR-256 | chr13:66130643-66131418   | fu |
| 257 | TAR-257 | chr13:66136493-66137558   | fu |
| 258 | TAR-258 | chr13:66143715-66144227   | fu |
| 259 | TAR-259 | chr13:66146756-66147371   | fu |
| 260 | TAR-260 | chr13:66147566-66147913   | fu |
| 261 | TAR-261 | chr13:66168822-66169469   | fu |
| 262 | TAR-262 | chr13:66173781-66174483   | ff |
| 263 | TAR-263 | chr13:66175535-66175867   | fu |
| 264 | TAR-264 | chr13:66176931-66177453   | fu |
| 265 | TAR-265 | chr13:66203334-66204145   | fu |
| 266 | TAR-266 | chr13:66209894-66211022   | fu |
| 267 | TAR-267 | chr13:66225542-66226054   | fu |
| 268 | TAR-268 | chr13:66226744-66227234   | fu |
| 269 | TAR-269 | chr13:66228627-66229242   | fu |
| 270 | TAR-270 | chr13:66229437-66229784   | fu |
| 271 | TAR-271 | chr13:66246371-66246709   | du |
| 272 | TAR-272 | chr13:66268126-66269007   | fu |
| 273 | TAR-273 | chr13:66306287-66307442   | fu |
| 274 | TAR-274 | chr13:66322168-66323248   | ff |
| 275 | TAR-275 | chr13:66324363-66325144   | ff |
| 276 | TAR-276 | chr13:66855675-66856422   | fu |
| 277 | TAR-277 | chr13:66862813-66863462   | fu |
| 278 | TAR-278 | chr13:66895904-66896666   | fu |
| 279 | TAR-279 | chr13:66898273-66899251   | fu |
| 280 | TAR-280 | chr13:66901088-66901887   | fu |
| 281 | TAR-281 | chr13:66902119-66902751   | fu |
| 282 | TAR-282 | chr13:66946141-66946873   | ff |
| 283 | TAR-283 | chr13:66960525-66960890   | fu |
| 284 | TAR-284 | chr13:74665910-74668238   | fu |
| 285 | TAR-285 | chr13:83972478-83973111   | fu |
| 286 | TAR-286 | chr13:85266163-85267090   | du |
| 287 | TAR-287 | chr13:91400742-91401052   | fu |
| 288 | TAR-288 | chr13:91401637-91402321   | du |
| 289 | TAR-289 | chr13:99383453-99384054   | ud |
| 290 | TAR-290 | chr13:101679251-101679849 | uf |
| 291 | TAR-291 | chr13:109100379-109100862 | uf |
| 292 | TAR-292 | chr13:113220755-113222128 | ff |

|     |         |                           |    |
|-----|---------|---------------------------|----|
| 293 | TAR-293 | chr13:116318732-116319861 | uf |
| 294 | TAR-294 | chr14:3361031-3361512     | fu |
| 295 | TAR-295 | chr14:7143457-7144793     | fu |
| 296 | TAR-296 | chr14:15280672-15281409   | fu |
| 297 | TAR-297 | chr14:16781803-16782253   | fu |
| 298 | TAR-298 | chr14:17786280-17786620   | fd |
| 299 | TAR-299 | chr14:20348235-20348845   | fu |
| 300 | TAR-300 | chr14:20428237-20429038   | fu |
| 301 | TAR-301 | chr14:27385350-27386063   | fu |
| 302 | TAR-302 | chr14:32929907-32930327   | uf |
| 303 | TAR-303 | chr14:33323653-33324117   | ff |
| 304 | TAR-304 | chr14:42159287-42159891   | du |
| 305 | TAR-305 | chr14:42180959-42181374   | fd |
| 306 | TAR-306 | chr14:42247667-42248596   | uf |
| 307 | TAR-307 | chr14:42405311-42405940   | uf |
| 308 | TAR-308 | chr14:43513619-43514248   | uf |
| 309 | TAR-309 | chr14:44842750-44843955   | uu |
| 310 | TAR-310 | chr14:52988708-52989375   | uu |
| 311 | TAR-311 | chr14:57484208-57484788   | uu |
| 312 | TAR-312 | chr14:61943389-61943671   | uu |
| 313 | TAR-313 | chr14:61944164-61944460   | uu |
| 314 | TAR-314 | chr14:102381719-102381985 | ud |
| 315 | TAR-315 | chr15:5280652-5281346     | ff |
| 316 | TAR-316 | chr15:11540697-11541473   | ff |
| 317 | TAR-317 | chr15:19385425-19385952   | dd |
| 318 | TAR-318 | chr15:23419639-23420227   | ud |
| 319 | TAR-319 | chr15:25769725-25770396   | ud |
| 320 | TAR-320 | chr15:38892989-38893736   | ud |
| 321 | TAR-321 | chr15:41753589-41755047   | uu |
| 322 | TAR-322 | chr15:51920875-51921528   | uf |
| 323 | TAR-323 | chr15:60299734-60300413   | ud |
| 324 | TAR-324 | chr15:60300564-60301280   | uf |
| 325 | TAR-325 | chr15:69894480-69894877   | ud |
| 326 | TAR-326 | chr15:74916421-74917423   | du |
| 327 | TAR-327 | chr15:78651377-78651920   | fu |
| 328 | TAR-328 | chr15:78652148-78652872   | uf |
| 329 | TAR-329 | chr15:79613361-79613622   | fu |
| 330 | TAR-330 | chr15:89596310-89598744   | uu |
| 331 | TAR-331 | chr15:96954688-96955023   | fu |
| 332 | TAR-332 | chr15:97448175-97448375   | df |
| 333 | TAR-333 | chr15:103418171-103418828 | uu |
| 334 | TAR-334 | chr15:103448331-103450427 | uu |
| 335 | TAR-335 | chr16:14957861-14958392   | ud |

|     |         |                         |    |
|-----|---------|-------------------------|----|
| 336 | TAR-336 | chr16:18681427-18681952 | ud |
| 337 | TAR-337 | chr16:20129598-20130142 | ff |
| 338 | TAR-338 | chr16:23050422-23050795 | ff |
| 339 | TAR-339 | chr16:30139590-30139847 | uf |
| 340 | TAR-340 | chr16:37696814-37697438 | uf |
| 341 | TAR-341 | chr16:56456824-56457650 | ff |
| 342 | TAR-342 | chr16:64917109-64918701 | ud |
| 343 | TAR-343 | chr16:84513770-84514165 | ud |
| 344 | TAR-344 | chr16:85644524-85645317 | ud |
| 345 | TAR-345 | chr16:90345720-90346378 | ff |
| 346 | TAR-346 | chr17:4880592-4881295   | uf |
| 347 | TAR-347 | chr17:16457257-16457707 | fu |
| 348 | TAR-348 | chr17:21611784-21612212 | ud |
| 349 | TAR-349 | chr17:31780812-31781040 | ff |
| 350 | TAR-350 | chr17:31781199-31781737 | ff |
| 351 | TAR-351 | chr17:32989166-32989844 | uf |
| 352 | TAR-352 | chr17:35583013-35583806 | du |
| 353 | TAR-353 | chr17:35585164-35586088 | ff |
| 354 | TAR-354 | chr17:36368203-36368536 | dd |
| 355 | TAR-355 | chr17:39773608-39773993 | uu |
| 356 | TAR-356 | chr17:47547224-47548602 | uf |
| 357 | TAR-357 | chr17:55282518-55282819 | uf |
| 358 | TAR-358 | chr17:57267336-57267688 | ff |
| 359 | TAR-359 | chr17:63920250-63920579 | fu |
| 360 | TAR-360 | chr17:74728790-74729127 | ff |
| 361 | TAR-361 | chr17:80332850-80333797 | ud |
| 362 | TAR-362 | chr17:82809272-82810179 | ud |
| 363 | TAR-363 | chr17:85897966-85898329 | ud |
| 364 | TAR-364 | chr18:3004815-3005408   | fu |
| 365 | TAR-365 | chr18:6665717-6666583   | ff |
| 366 | TAR-366 | chr18:6667405-6667706   | uu |
| 367 | TAR-367 | chr18:8051266-8052077   | uf |
| 368 | TAR-368 | chr18:8415158-8416018   | ud |
| 369 | TAR-369 | chr18:8416397-8417188   | ud |
| 370 | TAR-370 | chr18:20707238-20707623 | ud |
| 371 | TAR-371 | chr18:30579368-30579736 | uf |
| 372 | TAR-372 | chr18:38519710-38520235 | ud |
| 373 | TAR-373 | chr18:45229469-45229737 | fu |
| 374 | TAR-374 | chr18:45230011-45230975 | fu |
| 375 | TAR-375 | chr18:47574156-47574856 | ud |
| 376 | TAR-376 | chr18:51162765-51163379 | fd |
| 377 | TAR-377 | chr18:59933744-59934065 | ud |
| 378 | TAR-378 | chr18:63703119-63703969 | ud |

|     |         |                          |    |
|-----|---------|--------------------------|----|
| 379 | TAR-379 | chr18:63704139-63704789  | uf |
| 380 | TAR-380 | chr18:64240466-64241165  | ud |
| 381 | TAR-381 | chr18:64448005-64448377  | ud |
| 382 | TAR-382 | chr18:70806908-70807130  | du |
| 383 | TAR-383 | chr18:70807298-70807727  | uu |
| 384 | TAR-384 | chr18:80155687-80156237  | ud |
| 385 | TAR-385 | chr18:87643437-87644076  | fd |
| 386 | TAR-386 | chr19:5824724-5826861    | ud |
| 387 | TAR-387 | chr19:5828390-5829124    | ud |
| 388 | TAR-388 | chr19:5830143-5831088    | ud |
| 389 | TAR-389 | chr19:5835257-5836357    | ud |
| 390 | TAR-390 | chr19:11512601-11513366  | fu |
| 391 | TAR-391 | chr19:12348023-12348753  | ud |
| 392 | TAR-392 | chr19:15268039-15268686  | ff |
| 393 | TAR-393 | chr19:28108007-28108612  | ff |
| 394 | TAR-394 | chr19:33152433-33153049  | ff |
| 395 | TAR-395 | chr19:42234125-42234629  | ud |
| 396 | TAR-396 | chr19:53598257-53599429  | ff |
| 397 | TAR-397 | chr19:59162138-59162395  | ud |
| 398 | TAR-398 | chr19:59162552-59163447  | ff |
| 399 | TAR-399 | chr19:61242890-61243746  | uu |
| 400 | TAR-400 | chr19:61243902-61244577  | fu |
| 401 | TAR-401 | chr2:105014831-105015306 | fu |
| 402 | TAR-402 | chr2:168235882-168236474 | ff |
| 403 | TAR-403 | chr2:169025146-169025661 | ff |
| 404 | TAR-404 | chr2:171393654-171394050 | fu |
| 405 | TAR-405 | chr2:171640384-171641049 | ff |
| 406 | TAR-406 | chr2:172029957-172030836 | ff |
| 407 | TAR-407 | chr2:174795358-174796125 | fu |
| 408 | TAR-408 | chr2:174798687-174799644 | fu |
| 409 | TAR-409 | chr2:174823251-174824034 | fu |
| 410 | TAR-410 | chr2:174830207-174831031 | fu |
| 411 | TAR-411 | chr2:174833988-174834669 | fu |
| 412 | TAR-412 | chr2:174902143-174902651 | fu |
| 413 | TAR-413 | chr2:174907881-174908494 | fu |
| 414 | TAR-414 | chr2:174908668-174909227 | fu |
| 415 | TAR-415 | chr2:174909563-174910306 | fu |
| 416 | TAR-416 | chr2:174918712-174919764 | ff |
| 417 | TAR-417 | chr2:174938597-174939293 | fu |
| 418 | TAR-418 | chr2:174939465-174940448 | fu |
| 419 | TAR-419 | chr2:174945293-174945767 | fu |
| 420 | TAR-420 | chr2:175313978-175315120 | fu |
| 421 | TAR-421 | chr2:175387637-175388497 | fu |

|     |         |                          |    |
|-----|---------|--------------------------|----|
| 422 | TAR-422 | chr2:175397965-175398698 | fu |
| 423 | TAR-423 | chr2:175399034-175399594 | fu |
| 424 | TAR-424 | chr2:175399760-175400317 | fu |
| 425 | TAR-425 | chr2:175401540-175402516 | fu |
| 426 | TAR-426 | chr2:175405607-175406115 | fu |
| 427 | TAR-427 | chr2:175471878-175472718 | fu |
| 428 | TAR-428 | chr2:175486957-175487699 | fu |
| 429 | TAR-429 | chr2:175568145-175569138 | fu |
| 430 | TAR-430 | chr2:175569310-175569955 | fu |
| 431 | TAR-431 | chr2:175574475-175575221 | du |
| 432 | TAR-432 | chr2:175589280-175590767 | fu |
| 433 | TAR-433 | chr2:177664216-177665196 | fu |
| 434 | TAR-434 | chr2:177696100-177696413 | fu |
| 435 | TAR-435 | chr2:177697651-177698406 | fu |
| 436 | TAR-436 | chr2:177817356-177817739 | fu |
| 437 | TAR-437 | chr3:5750817-5751270     | ud |
| 438 | TAR-438 | chr3:39116489-39117005   | ff |
| 439 | TAR-439 | chr3:41780071-41780511   | fu |
| 440 | TAR-440 | chr3:41781419-41781980   | uu |
| 441 | TAR-441 | chr3:47034546-47034949   | uu |
| 442 | TAR-442 | chr3:49185426-49185735   | ud |
| 443 | TAR-443 | chr3:49185920-49186606   | ud |
| 444 | TAR-444 | chr3:53496398-53496827   | ud |
| 445 | TAR-445 | chr3:56379396-56379670   | fu |
| 446 | TAR-446 | chr3:57521691-57522218   | uu |
| 447 | TAR-447 | chr3:59235660-59237027   | uu |
| 448 | TAR-448 | chr3:59571009-59571432   | uu |
| 449 | TAR-449 | chr3:59571597-59572735   | du |
| 450 | TAR-450 | chr3:62727688-62728091   | uf |
| 451 | TAR-451 | chr3:63709450-63710195   | uf |
| 452 | TAR-452 | chr3:69767660-69768465   | du |
| 453 | TAR-453 | chr3:107671016-107671588 | ud |
| 454 | TAR-454 | chr3:112105372-112105944 | ff |
| 455 | TAR-455 | chr3:113431654-113432082 | fu |
| 456 | TAR-456 | chr3:119412432-119412743 | uf |
| 457 | TAR-457 | chr3:124088444-124089551 | fu |
| 458 | TAR-458 | chr3:129164884-129165150 | ud |
| 459 | TAR-459 | chr3:136611417-136611883 | uf |
| 460 | TAR-460 | chr3:157480198-157480677 | uu |
| 461 | TAR-461 | chr4:3016867-3018322     | fu |
| 462 | TAR-462 | chr4:8321277-8321645     | fu |
| 463 | TAR-463 | chr4:21953580-21954416   | ff |
| 464 | TAR-464 | chr4:60068336-60068830   | ff |

|     |         |                          |    |
|-----|---------|--------------------------|----|
| 465 | TAR-465 | chr4:60069713-60071108   | fu |
| 466 | TAR-466 | chr4:61420741-61421311   | fu |
| 467 | TAR-467 | chr4:61422300-61423043   | fu |
| 468 | TAR-468 | chr4:61423829-61424589   | fu |
| 469 | TAR-469 | chr4:93501186-93501842   | ff |
| 470 | TAR-470 | chr4:109854032-109854693 | ff |
| 471 | TAR-471 | chr4:118219690-118221337 | ff |
| 472 | TAR-472 | chr4:148810432-148810943 | ud |
| 473 | TAR-473 | chr5:3875450-3876237     | ff |
| 474 | TAR-474 | chr5:10559025-10559573   | uu |
| 475 | TAR-475 | chr5:14900063-14900851   | fu |
| 476 | TAR-476 | chr5:14902203-14903037   | fu |
| 477 | TAR-477 | chr5:14904107-14904445   | fu |
| 478 | TAR-478 | chr5:14904608-14906823   | fu |
| 479 | TAR-479 | chr5:14907479-14908050   | fu |
| 480 | TAR-480 | chr5:14917524-14917991   | fu |
| 481 | TAR-481 | chr5:14918943-14919758   | fu |
| 482 | TAR-482 | chr5:16973470-16973763   | fu |
| 483 | TAR-483 | chr5:16974085-16975251   | fu |
| 484 | TAR-484 | chr5:16975738-16976235   | fu |
| 485 | TAR-485 | chr5:26335820-26336769   | fu |
| 486 | TAR-486 | chr5:26341498-26342303   | fu |
| 487 | TAR-487 | chr5:26351239-26351592   | fu |
| 488 | TAR-488 | chr5:26367481-26368169   | fu |
| 489 | TAR-489 | chr5:26368437-26369155   | fu |
| 490 | TAR-490 | chr5:26418043-26418494   | fu |
| 491 | TAR-491 | chr5:26433448-26433992   | fu |
| 492 | TAR-492 | chr5:30120831-30121745   | fu |
| 493 | TAR-493 | chr5:41733346-41734217   | ud |
| 494 | TAR-494 | chr5:52972605-52972926   | ud |
| 495 | TAR-495 | chr5:60433954-60434313   | uu |
| 496 | TAR-496 | chr5:82765875-82766717   | fu |
| 497 | TAR-497 | chr5:87426166-87427431   | ud |
| 498 | TAR-498 | chr5:94336731-94337354   | ff |
| 499 | TAR-499 | chr5:94946525-94946901   | fu |
| 500 | TAR-500 | chr5:94947741-94948558   | fu |
| 501 | TAR-501 | chr5:95024398-95025021   | ff |
| 502 | TAR-502 | chr5:96002548-96003171   | ff |
| 503 | TAR-503 | chr5:96403215-96404004   | ud |
| 504 | TAR-504 | chr5:106645236-106645742 | uu |
| 505 | TAR-505 | chr5:115342497-115343288 | ff |
| 506 | TAR-506 | chr5:134315126-134318477 | ud |
| 507 | TAR-507 | chr5:136102018-136103104 | fu |

|     |         |                          |    |
|-----|---------|--------------------------|----|
| 508 | TAR-508 | chr5:140127812-140129234 | ff |
| 509 | TAR-509 | chr5:146976341-146976880 | ff |
| 510 | TAR-510 | chr5:147293518-147293914 | du |
| 511 | TAR-511 | chr5:147309093-147309778 | fu |
| 512 | TAR-512 | chr5:147320141-147321504 | fu |
| 513 | TAR-513 | chr5:147386480-147387271 | ud |
| 514 | TAR-514 | chr6:9839894-9840167     | du |
| 515 | TAR-515 | chr6:19268425-19269101   | fu |
| 516 | TAR-516 | chr6:37636685-37637000   | uf |
| 517 | TAR-517 | chr6:47602300-47603431   | fu |
| 518 | TAR-518 | chr6:47705158-47706056   | fu |
| 519 | TAR-519 | chr6:47706664-47707318   | du |
| 520 | TAR-520 | chr6:47709213-47710375   | ff |
| 521 | TAR-521 | chr6:47713135-47713551   | ud |
| 522 | TAR-522 | chr6:47714785-47715939   | fu |
| 523 | TAR-523 | chr6:47719372-47720293   | ff |
| 524 | TAR-524 | chr6:47721871-47722262   | ud |
| 525 | TAR-525 | chr6:47725658-47726284   | fu |
| 526 | TAR-526 | chr6:66695976-66696319   | uu |
| 527 | TAR-527 | chr6:66825275-66825749   | uf |
| 528 | TAR-528 | chr6:71591428-71592123   | uu |
| 529 | TAR-529 | chr6:76234429-76234897   | fu |
| 530 | TAR-530 | chr6:83550759-83551525   | uf |
| 531 | TAR-531 | chr6:99790019-99790257   | ud |
| 532 | TAR-532 | chr6:102886508-102887546 | fu |
| 533 | TAR-533 | chr6:126384540-126385667 | ff |
| 534 | TAR-534 | chr6:127297409-127298456 | ff |
| 535 | TAR-535 | chr6:133710948-133712366 | ud |
| 536 | TAR-536 | chr6:140183288-140183735 | fu |
| 537 | TAR-537 | chr6:141086674-141087060 | ud |
| 538 | TAR-538 | chr6:145797555-145798373 | ff |
| 539 | TAR-539 | chr7:3181127-3181932     | ud |
| 540 | TAR-540 | chr7:12430493-12431029   | ff |
| 541 | TAR-541 | chr7:15352804-15353830   | ff |
| 542 | TAR-542 | chr7:15354081-15356074   | ff |
| 543 | TAR-543 | chr7:15356310-15358030   | ff |
| 544 | TAR-544 | chr7:15381473-15382242   | fu |
| 545 | TAR-545 | chr7:15454802-15455458   | fu |
| 546 | TAR-546 | chr7:15490585-15491161   | fu |
| 547 | TAR-547 | chr7:15491797-15492498   | ff |
| 548 | TAR-548 | chr7:15492753-15493235   | fu |
| 549 | TAR-549 | chr7:15592649-15593182   | ff |
| 550 | TAR-550 | chr7:15594287-15595423   | ff |



|     |         |                        |    |
|-----|---------|------------------------|----|
| 551 | TAR-551 | chr7:15610048-15610801 | ff |
| 552 | TAR-552 | chr7:15636672-15637035 | fu |
| 553 | TAR-553 | chr7:15714312-15715244 | ff |
| 554 | TAR-554 | chr7:15715507-15717479 | ff |
| 555 | TAR-555 | chr7:15717751-15718205 | ff |
| 556 | TAR-556 | chr7:15718384-15719970 | ff |
| 557 | TAR-557 | chr7:15723210-15723888 | fu |
| 558 | TAR-558 | chr7:15724046-15726645 | ff |
| 559 | TAR-559 | chr7:15726857-15727710 | ff |
| 560 | TAR-560 | chr7:15727896-15728887 | ff |
| 561 | TAR-561 | chr7:15729123-15730225 | ff |
| 562 | TAR-562 | chr7:15734582-15735112 | fu |
| 563 | TAR-563 | chr7:15735367-15737091 | ff |
| 564 | TAR-564 | chr7:15737263-15738013 | ff |
| 565 | TAR-565 | chr7:15738225-15739572 | ff |
| 566 | TAR-566 | chr7:15739757-15740255 | ff |
| 567 | TAR-567 | chr7:15740491-15742846 | ff |
| 568 | TAR-568 | chr7:15744472-15746513 | ff |
| 569 | TAR-569 | chr7:15746698-15749343 | ff |
| 570 | TAR-570 | chr7:15749555-15751584 | ff |
| 571 | TAR-571 | chr7:15751820-15752986 | ff |
| 572 | TAR-572 | chr7:15753207-15754054 | ff |
| 573 | TAR-573 | chr7:15755545-15757586 | ff |
| 574 | TAR-574 | chr7:15757779-15758790 | fu |
| 575 | TAR-575 | chr7:15759086-15760424 | ff |
| 576 | TAR-576 | chr7:15760636-15761983 | ff |
| 577 | TAR-577 | chr7:15762168-15762666 | ff |
| 578 | TAR-578 | chr7:15762902-15765392 | ff |
| 579 | TAR-579 | chr7:15766881-15768894 | ff |
| 580 | TAR-580 | chr7:15769119-15771765 | ff |
| 581 | TAR-581 | chr7:15771977-15773971 | ff |
| 582 | TAR-582 | chr7:15774243-15776734 | ff |
| 583 | TAR-583 | chr7:15778223-15780266 | ff |
| 584 | TAR-584 | chr7:15780795-15783048 | ff |
| 585 | TAR-585 | chr7:15783285-15784629 | ff |
| 586 | TAR-586 | chr7:15784814-15785312 | ff |
| 587 | TAR-587 | chr7:15785548-15788038 | ff |
| 588 | TAR-588 | chr7:15789527-15794379 | ff |
| 589 | TAR-589 | chr7:15794621-15796651 | ff |
| 590 | TAR-590 | chr7:15796887-15797367 | fu |
| 591 | TAR-591 | chr7:15797524-15799378 | ff |
| 592 | TAR-592 | chr7:15800867-15805739 | ff |
| 593 | TAR-593 | chr7:15805951-15807981 | ff |

|     |         |                        |    |
|-----|---------|------------------------|----|
| 594 | TAR-594 | chr7:15808217-15810378 | ff |
| 595 | TAR-595 | chr7:15812197-15814580 | ff |
| 596 | TAR-596 | chr7:15814760-15817043 | ff |
| 597 | TAR-597 | chr7:15817255-15819285 | ff |
| 598 | TAR-598 | chr7:15819521-15820772 | ff |
| 599 | TAR-599 | chr7:15820976-15822011 | ff |
| 600 | TAR-600 | chr7:15823500-15828371 | ff |
| 601 | TAR-601 | chr7:15828583-15829929 | ff |
| 602 | TAR-602 | chr7:15830114-15830626 | ff |
| 603 | TAR-603 | chr7:15830862-15833352 | ff |
| 604 | TAR-604 | chr7:15834841-15839710 | ff |
| 605 | TAR-605 | chr7:15839922-15841952 | ff |
| 606 | TAR-606 | chr7:15842188-15844679 | ff |
| 607 | TAR-607 | chr7:15846168-15851041 | ff |
| 608 | TAR-608 | chr7:15851253-15853283 | ff |
| 609 | TAR-609 | chr7:15853519-15856009 | ff |
| 610 | TAR-610 | chr7:15857706-15858699 | fu |
| 611 | TAR-611 | chr7:15873799-15874541 | ud |
| 612 | TAR-612 | chr7:16274845-16275416 | ff |
| 613 | TAR-613 | chr7:16276368-16278743 | ff |
| 614 | TAR-614 | chr7:17304448-17305252 | uf |
| 615 | TAR-615 | chr7:17724222-17724675 | ud |
| 616 | TAR-616 | chr7:23559264-23559565 | fu |
| 617 | TAR-617 | chr7:29166522-29166973 | ud |
| 618 | TAR-618 | chr7:39334380-39334899 | fu |
| 619 | TAR-619 | chr7:46454890-46455663 | fu |
| 620 | TAR-620 | chr7:46457690-46458537 | fu |
| 621 | TAR-621 | chr7:46460572-46461204 | fu |
| 622 | TAR-622 | chr7:46591437-46592007 | ff |
| 623 | TAR-623 | chr7:46593496-46594015 | fu |
| 624 | TAR-624 | chr7:46597166-46597742 | du |
| 625 | TAR-625 | chr7:48446466-48447018 | du |
| 626 | TAR-626 | chr7:58195432-58195889 | df |
| 627 | TAR-627 | chr7:58201601-58202280 | fu |
| 628 | TAR-628 | chr7:58203476-58204638 | ff |
| 629 | TAR-629 | chr7:58204959-58207602 | ff |
| 630 | TAR-630 | chr7:58210353-58211031 | ff |
| 631 | TAR-631 | chr7:58212223-58213385 | ff |
| 632 | TAR-632 | chr7:58213706-58216347 | ff |
| 633 | TAR-633 | chr7:58219099-58219778 | ff |
| 634 | TAR-634 | chr7:58220978-58222140 | ff |
| 635 | TAR-635 | chr7:58222461-58225100 | ff |
| 636 | TAR-636 | chr7:58227852-58228531 | ff |

|     |         |                          |    |
|-----|---------|--------------------------|----|
| 637 | TAR-637 | chr7:58229729-58230891   | ff |
| 638 | TAR-638 | chr7:58231212-58233854   | ff |
| 639 | TAR-639 | chr7:58236606-58237285   | ff |
| 640 | TAR-640 | chr7:58238481-58239643   | ff |
| 641 | TAR-641 | chr7:58239964-58242360   | ff |
| 642 | TAR-642 | chr7:58582884-58583852   | ff |
| 643 | TAR-643 | chr7:86934994-86935637   | fu |
| 644 | TAR-644 | chr7:112400407-112400634 | fu |
| 645 | TAR-645 | chr7:112400896-112401356 | fu |
| 646 | TAR-646 | chr7:123967968-123969344 | ud |
| 647 | TAR-647 | chr7:124444320-124444892 | ff |
| 648 | TAR-648 | chr7:132691038-132692066 | ff |
| 649 | TAR-649 | chr7:135156457-135156739 | fu |
| 650 | TAR-650 | chr7:135185758-135186368 | fd |
| 651 | TAR-651 | chr7:144002525-144002941 | fd |
| 652 | TAR-652 | chr7:144003181-144003819 | dd |
| 653 | TAR-653 | chr7:148363795-148364405 | ud |
| 654 | TAR-654 | chr8:4039907-4040351     | du |
| 655 | TAR-655 | chr8:8744925-8745150     | fu |
| 656 | TAR-656 | chr8:11683442-11684243   | uu |
| 657 | TAR-657 | chr8:15678178-15678566   | fu |
| 658 | TAR-658 | chr8:19699509-19700284   | fu |
| 659 | TAR-659 | chr8:19706330-19706774   | fu |
| 660 | TAR-660 | chr8:19709690-19710237   | fu |
| 661 | TAR-661 | chr8:19710836-19711822   | fu |
| 662 | TAR-662 | chr8:19712500-19712936   | fu |
| 663 | TAR-663 | chr8:19713536-19714588   | fu |
| 664 | TAR-664 | chr8:19719055-19720168   | fu |
| 665 | TAR-665 | chr8:19723032-19723729   | fu |
| 666 | TAR-666 | chr8:19725674-19726090   | fu |
| 667 | TAR-667 | chr8:19755099-19756999   | fu |
| 668 | TAR-668 | chr8:19757189-19757698   | fu |
| 669 | TAR-669 | chr8:19757915-19758992   | fu |
| 670 | TAR-670 | chr8:19759190-19760598   | fu |
| 671 | TAR-671 | chr8:19761622-19762672   | fu |
| 672 | TAR-672 | chr8:19775445-19776546   | fu |
| 673 | TAR-673 | chr8:19776822-19777791   | fu |
| 674 | TAR-674 | chr8:19800934-19801615   | fu |
| 675 | TAR-675 | chr8:19801849-19802782   | fu |
| 676 | TAR-676 | chr8:19854073-19854590   | fu |
| 677 | TAR-677 | chr8:20022233-20023047   | fu |
| 678 | TAR-678 | chr8:20023299-20024606   | fu |
| 679 | TAR-679 | chr8:20027423-20028437   | fu |

|     |         |                        |    |
|-----|---------|------------------------|----|
| 680 | TAR-680 | chr8:20028619-20029768 | fu |
| 681 | TAR-681 | chr8:30396834-30397368 | ff |
| 682 | TAR-682 | chr8:56196989-56198684 | fu |
| 683 | TAR-683 | chr8:56198976-56209035 | fu |
| 684 | TAR-684 | chr8:57975252-57975751 | du |
| 685 | TAR-685 | chr8:57995075-57995655 | ff |
| 686 | TAR-686 | chr8:57996321-57997796 | fu |
| 687 | TAR-687 | chr8:57998443-57999800 | fu |
| 688 | TAR-688 | chr8:71943752-71944960 | fu |
| 689 | TAR-689 | chr8:71945617-71946360 | fu |
| 690 | TAR-690 | chr8:71947905-71948929 | fu |
| 691 | TAR-691 | chr8:71957860-71958130 | fu |
| 692 | TAR-692 | chr8:71964198-71964658 | fu |
| 693 | TAR-693 | chr8:71969445-71970439 | fu |
| 694 | TAR-694 | chr8:71973207-71973596 | fu |
| 695 | TAR-695 | chr8:71973911-71974879 | fu |
| 696 | TAR-696 | chr8:71997280-71999545 | fu |
| 697 | TAR-697 | chr8:72000424-72000821 | fu |
| 698 | TAR-698 | chr8:72001397-72002168 | fu |
| 699 | TAR-699 | chr8:72004431-72005612 | fu |
| 700 | TAR-700 | chr8:72020127-72020397 | fu |
| 701 | TAR-701 | chr8:72032882-72033427 | fu |
| 702 | TAR-702 | chr8:72033628-72034076 | fu |
| 703 | TAR-703 | chr8:72038806-72039614 | ff |
| 704 | TAR-704 | chr8:72074365-72075054 | fu |
| 705 | TAR-705 | chr8:72085268-72085966 | fu |
| 706 | TAR-706 | chr8:72086118-72086400 | uu |
| 707 | TAR-707 | chr8:72086600-72088477 | uu |
| 708 | TAR-708 | chr8:72090687-72091142 | fu |
| 709 | TAR-709 | chr8:72094389-72094893 | ud |
| 710 | TAR-710 | chr8:72098472-72099335 | fu |
| 711 | TAR-711 | chr8:72099634-72100121 | uf |
| 712 | TAR-712 | chr8:72107618-72108246 | du |
| 713 | TAR-713 | chr8:72534343-72534934 | ud |
| 714 | TAR-714 | chr8:73664104-73664362 | fu |
| 715 | TAR-715 | chr8:73693470-73693991 | fu |
| 716 | TAR-716 | chr8:74349903-74350436 | fu |
| 717 | TAR-717 | chr8:74352166-74352620 | fu |
| 718 | TAR-718 | chr8:74552613-74553271 | fu |
| 719 | TAR-719 | chr8:74559414-74559849 | uf |
| 720 | TAR-720 | chr8:74807652-74808051 | ud |
| 721 | TAR-721 | chr8:81010030-81010332 | ud |
| 722 | TAR-722 | chr8:86725640-86726567 | ud |

|     |         |                          |    |
|-----|---------|--------------------------|----|
| 723 | TAR-723 | chr8:86726749-86727392   | fd |
| 724 | TAR-724 | chr8:100748176-100748698 | fu |
| 725 | TAR-725 | chr8:109786749-109787175 | ud |
| 726 | TAR-726 | chr8:113833711-113834025 | fu |
| 727 | TAR-727 | chr8:119025618-119026362 | fu |
| 728 | TAR-728 | chr8:129118829-129119679 | ud |
| 729 | TAR-729 | chr9:4978320-4979305     | uf |
| 730 | TAR-730 | chr9:7723082-7723451     | fu |
| 731 | TAR-731 | chr9:7723658-7724672     | fu |
| 732 | TAR-732 | chr9:14131776-14132171   | uf |
| 733 | TAR-733 | chr9:17537500-17538631   | uf |
| 734 | TAR-734 | chr9:27215725-27216125   | du |
| 735 | TAR-735 | chr9:35112795-35113179   | du |
| 736 | TAR-736 | chr9:35858379-35858799   | du |
| 737 | TAR-737 | chr9:38881746-38882294   | ud |
| 738 | TAR-738 | chr9:38883028-38883427   | fd |
| 739 | TAR-739 | chr9:51465178-51465549   | du |
| 740 | TAR-740 | chr9:54672353-54673097   | ud |
| 741 | TAR-741 | chr9:55366892-55367223   | fu |
| 742 | TAR-742 | chr9:63746112-63747101   | uu |
| 743 | TAR-743 | chr9:96805961-96806691   | uf |
| 744 | TAR-744 | chr9:100119168-100120138 | ff |
| 745 | TAR-745 | chr9:119072181-119073207 | uu |
| 746 | TAR-746 | chrX:3000066-3000929     | ff |
| 747 | TAR-747 | chrX:3040722-3041599     | ff |
| 748 | TAR-748 | chrX:3051480-3052208     | fu |
| 749 | TAR-749 | chrX:3053287-3054027     | fu |
| 750 | TAR-750 | chrX:3055051-3055896     | ff |
| 751 | TAR-751 | chrX:3058205-3061499     | ff |
| 752 | TAR-752 | chrX:3061741-3062126     | fu |
| 753 | TAR-753 | chrX:3086145-3087164     | fu |
| 754 | TAR-754 | chrX:3101382-3101808     | fu |
| 755 | TAR-755 | chrX:3117066-3117659     | fu |
| 756 | TAR-756 | chrX:3123135-3123553     | fu |
| 757 | TAR-757 | chrX:3132275-3132820     | fu |
| 758 | TAR-758 | chrX:3135329-3135918     | fu |
| 759 | TAR-759 | chrX:3149920-3150521     | ff |
| 760 | TAR-760 | chrX:3152793-3153510     | ff |
| 761 | TAR-761 | chrX:3156308-3157039     | ff |
| 762 | TAR-762 | chrX:3185151-3186215     | ff |
| 763 | TAR-763 | chrX:3190343-3190850     | du |
| 764 | TAR-764 | chrX:3197800-3198528     | ff |
| 765 | TAR-765 | chrX:3206741-3207350     | fu |

|     |         |                      |    |
|-----|---------|----------------------|----|
| 766 | TAR-766 | chrX:3209161-3209872 | fu |
| 767 | TAR-767 | chrX:3210088-3211650 | fu |
| 768 | TAR-768 | chrX:3211861-3214457 | fu |
| 769 | TAR-769 | chrX:3215276-3219896 | fu |
| 770 | TAR-770 | chrX:3220073-3221456 | fu |
| 771 | TAR-771 | chrX:3221653-3223731 | ff |
| 772 | TAR-772 | chrX:3226216-3227163 | ff |
| 773 | TAR-773 | chrX:3230772-3232440 | ff |
| 774 | TAR-774 | chrX:3238746-3239172 | fu |
| 775 | TAR-775 | chrX:3239547-3240157 | ff |
| 776 | TAR-776 | chrX:3294601-3295430 | ff |
| 777 | TAR-777 | chrX:3297640-3297992 | fu |
| 778 | TAR-778 | chrX:3300031-3300815 | ff |
| 779 | TAR-779 | chrX:3302797-3303523 | ff |
| 780 | TAR-780 | chrX:3307316-3307872 | ff |
| 781 | TAR-781 | chrX:3368087-3368740 | ff |
| 782 | TAR-782 | chrX:3371244-3371732 | ff |
| 783 | TAR-783 | chrX:3375493-3376246 | ff |
| 784 | TAR-784 | chrX:3378022-3379020 | ff |
| 785 | TAR-785 | chrX:3382502-3382948 | fu |
| 786 | TAR-786 | chrX:3383545-3384098 | ff |
| 787 | TAR-787 | chrX:3392294-3392895 | ff |
| 788 | TAR-788 | chrX:3393731-3394698 | ff |
| 789 | TAR-789 | chrX:3394987-3396255 | ff |
| 790 | TAR-790 | chrX:3396740-3397090 | ff |
| 791 | TAR-791 | chrX:3397373-3397779 | fu |
| 792 | TAR-792 | chrX:3424991-3426699 | ff |
| 793 | TAR-793 | chrX:3433089-3433673 | ff |
| 794 | TAR-794 | chrX:3433850-3434509 | ff |
| 795 | TAR-795 | chrX:3436592-3437157 | ff |
| 796 | TAR-796 | chrX:3437378-3438096 | ff |
| 797 | TAR-797 | chrX:3439155-3439817 | ff |
| 798 | TAR-798 | chrX:3440000-3440867 | ff |
| 799 | TAR-799 | chrX:3441118-3442412 | ff |
| 800 | TAR-800 | chrX:3444579-3445505 | ff |
| 801 | TAR-801 | chrX:3447496-3448054 | ff |
| 802 | TAR-802 | chrX:3452458-3453172 | ff |
| 803 | TAR-803 | chrX:3453389-3454208 | ff |
| 804 | TAR-804 | chrX:3458437-3459040 | ff |
| 805 | TAR-805 | chrX:3459238-3459848 | ff |
| 806 | TAR-806 | chrX:3506654-3507210 | ff |
| 807 | TAR-807 | chrX:3510973-3511726 | ff |
| 808 | TAR-808 | chrX:3513508-3514506 | ff |

|     |         |                      |    |
|-----|---------|----------------------|----|
| 809 | TAR-809 | chrX:3517982-3518288 | fu |
| 810 | TAR-810 | chrX:3527777-3528377 | ff |
| 811 | TAR-811 | chrX:3529212-3530180 | ff |
| 812 | TAR-812 | chrX:3532857-3533263 | fu |
| 813 | TAR-813 | chrX:3549455-3549918 | fu |
| 814 | TAR-814 | chrX:3553105-3553725 | fu |
| 815 | TAR-815 | chrX:3558376-3559239 | ff |
| 816 | TAR-816 | chrX:3568244-3568733 | fu |
| 817 | TAR-817 | chrX:3569452-3570460 | ff |
| 818 | TAR-818 | chrX:3578447-3579048 | ff |
| 819 | TAR-819 | chrX:3583773-3584220 | fu |
| 820 | TAR-820 | chrX:3635294-3635854 | ff |
| 821 | TAR-821 | chrX:3638730-3639375 | fu |
| 822 | TAR-822 | chrX:3640939-3641819 | ff |
| 823 | TAR-823 | chrX:3642525-3644229 | ff |
| 824 | TAR-824 | chrX:3645294-3645871 | ff |
| 825 | TAR-825 | chrX:3646240-3646704 | ff |
| 826 | TAR-826 | chrX:3649006-3650355 | ff |
| 827 | TAR-827 | chrX:3656608-3657314 | ff |
| 828 | TAR-828 | chrX:3662555-3662869 | fu |
| 829 | TAR-829 | chrX:3663355-3663965 | ff |
| 830 | TAR-830 | chrX:3672573-3673441 | ff |
| 831 | TAR-831 | chrX:3681305-3681564 | fu |
| 832 | TAR-832 | chrX:3681847-3682197 | df |
| 833 | TAR-833 | chrX:3683058-3683950 | ff |
| 834 | TAR-834 | chrX:3684324-3685206 | ff |
| 835 | TAR-835 | chrX:3686041-3686640 | ff |
| 836 | TAR-836 | chrX:3688383-3689012 | ff |
| 837 | TAR-837 | chrX:3694836-3695389 | fu |
| 838 | TAR-838 | chrX:3699910-3700908 | ff |
| 839 | TAR-839 | chrX:3702689-3703442 | ff |
| 840 | TAR-840 | chrX:3707201-3707757 | ff |
| 841 | TAR-841 | chrX:3710302-3710955 | ff |
| 842 | TAR-842 | chrX:3716660-3717614 | fu |
| 843 | TAR-843 | chrX:3717776-3718681 | ff |
| 844 | TAR-844 | chrX:3751574-3752986 | ff |
| 845 | TAR-845 | chrX:3765351-3765935 | ff |
| 846 | TAR-846 | chrX:3766157-3766771 | ff |
| 847 | TAR-847 | chrX:3768884-3769449 | ff |
| 848 | TAR-848 | chrX:3769670-3770388 | ff |
| 849 | TAR-849 | chrX:3771493-3772247 | ff |
| 850 | TAR-850 | chrX:3772415-3773220 | ff |
| 851 | TAR-851 | chrX:3773456-3774758 | ff |

|     |         |                      |    |
|-----|---------|----------------------|----|
| 852 | TAR-852 | chrX:3776924-3777851 | ff |
| 853 | TAR-853 | chrX:3792545-3792992 | ff |
| 854 | TAR-854 | chrX:3797709-3798015 | fu |
| 855 | TAR-855 | chrX:3798212-3798724 | ff |
| 856 | TAR-856 | chrX:3805325-3805939 | ff |
| 857 | TAR-857 | chrX:3806236-3807244 | ff |
| 858 | TAR-858 | chrX:3807586-3808424 | ff |
| 859 | TAR-859 | chrX:3820111-3821248 | ff |
| 860 | TAR-860 | chrX:3826807-3827270 | ff |
| 861 | TAR-861 | chrX:3842376-3843003 | fu |
| 862 | TAR-862 | chrX:3864367-3865020 | ff |
| 863 | TAR-863 | chrX:3867632-3868120 | ff |
| 864 | TAR-864 | chrX:3871879-3872603 | ff |
| 865 | TAR-865 | chrX:3874416-3875414 | ff |
| 866 | TAR-866 | chrX:3879903-3880456 | fu |
| 867 | TAR-867 | chrX:3886278-3886907 | ff |
| 868 | TAR-868 | chrX:3888650-3889250 | ff |
| 869 | TAR-869 | chrX:3889421-3891052 | ff |
| 870 | TAR-870 | chrX:3893094-3893444 | fu |
| 871 | TAR-871 | chrX:3910482-3911199 | ff |
| 872 | TAR-872 | chrX:3916109-3917670 | fu |
| 873 | TAR-873 | chrX:3918107-3918719 | fu |
| 874 | TAR-874 | chrX:3969180-3970303 | ff |
| 875 | TAR-875 | chrX:3970562-3971421 | fu |
| 876 | TAR-876 | chrX:3971604-3972266 | ff |
| 877 | TAR-877 | chrX:3973318-3974036 | ff |
| 878 | TAR-878 | chrX:3974257-3974728 | ff |
| 879 | TAR-879 | chrX:3976929-3977588 | ff |
| 880 | TAR-880 | chrX:3977765-3978349 | ff |
| 881 | TAR-881 | chrX:3984738-3986460 | ff |
| 882 | TAR-882 | chrX:3990689-3992101 | ff |
| 883 | TAR-883 | chrX:4032689-4033342 | ff |
| 884 | TAR-884 | chrX:4035886-4036442 | ff |
| 885 | TAR-885 | chrX:4040206-4040959 | ff |
| 886 | TAR-886 | chrX:4042744-4043666 | ff |
| 887 | TAR-887 | chrX:4054207-4054836 | ff |
| 888 | TAR-888 | chrX:4056579-4057165 | ff |
| 889 | TAR-889 | chrX:4058014-4058981 | ff |
| 890 | TAR-890 | chrX:4059270-4060538 | ff |
| 891 | TAR-891 | chrX:4061024-4061374 | ff |
| 892 | TAR-892 | chrX:4061657-4062297 | ff |
| 893 | TAR-893 | chrX:4078435-4079793 | ff |
| 894 | TAR-894 | chrX:4084074-4085743 | ff |



|     |         |                      |    |
|-----|---------|----------------------|----|
| 895 | TAR-895 | chrX:4092201-4092785 | ff |
| 896 | TAR-896 | chrX:4092962-4093337 | fu |
| 897 | TAR-897 | chrX:4095765-4096330 | ff |
| 898 | TAR-898 | chrX:4096551-4097269 | ff |
| 899 | TAR-899 | chrX:4098335-4098997 | ff |
| 900 | TAR-900 | chrX:4099180-4100039 | ff |
| 901 | TAR-901 | chrX:4100354-4101600 | ff |
| 902 | TAR-902 | chrX:4103892-4104696 | ff |
| 903 | TAR-903 | chrX:4106687-4107245 | ff |
| 904 | TAR-904 | chrX:4119392-4119839 | ff |
| 905 | TAR-905 | chrX:4124541-4125560 | ff |
| 906 | TAR-906 | chrX:4132170-4132786 | ff |
| 907 | TAR-907 | chrX:4133112-4134119 | ff |
| 908 | TAR-908 | chrX:4134446-4135282 | ff |
| 909 | TAR-909 | chrX:4156860-4157323 | ff |
| 910 | TAR-910 | chrX:4157945-4158580 | fu |
| 911 | TAR-911 | chrX:4180697-4181411 | ff |
| 912 | TAR-912 | chrX:4181705-4184059 | ff |
| 913 | TAR-913 | chrX:4186078-4186906 | ff |
| 914 | TAR-914 | chrX:4187644-4188482 | ff |
| 915 | TAR-915 | chrX:4203103-4203420 | du |
| 916 | TAR-916 | chrX:4223454-4224865 | ff |
| 917 | TAR-917 | chrX:4229613-4230266 | ff |
| 918 | TAR-918 | chrX:4230421-4231514 | ff |
| 919 | TAR-919 | chrX:4232056-4232580 | fu |
| 920 | TAR-920 | chrX:4236469-4237414 | ff |
| 921 | TAR-921 | chrX:4239888-4240572 | fu |
| 922 | TAR-922 | chrX:4240723-4241265 | fu |
| 923 | TAR-923 | chrX:4241842-4246243 | fu |
| 924 | TAR-924 | chrX:4246937-4248119 | fu |
| 925 | TAR-925 | chrX:4248498-4251566 | fu |
| 926 | TAR-926 | chrX:4251747-4253650 | fu |
| 927 | TAR-927 | chrX:4265016-4265725 | fu |
| 928 | TAR-928 | chrX:4277352-4277989 | fu |
| 929 | TAR-929 | chrX:4306514-4307272 | fu |
| 930 | TAR-930 | chrX:4310387-4310804 | fu |
| 931 | TAR-931 | chrX:4311852-4312514 | ff |
| 932 | TAR-932 | chrX:4313081-4313682 | ff |
| 933 | TAR-933 | chrX:4327530-4328176 | ff |
| 934 | TAR-934 | chrX:4333505-4334232 | fu |
| 935 | TAR-935 | chrX:4336959-4337330 | fu |
| 936 | TAR-936 | chrX:4393169-4393722 | fu |
| 937 | TAR-937 | chrX:4398243-4399241 | ff |

|     |         |                      |    |
|-----|---------|----------------------|----|
| 938 | TAR-938 | chrX:4401022-4401775 | ff |
| 939 | TAR-939 | chrX:4405534-4406090 | ff |
| 940 | TAR-940 | chrX:4408635-4409288 | ff |
| 941 | TAR-941 | chrX:4449907-4450517 | ff |
| 942 | TAR-942 | chrX:4451003-4451317 | fu |
| 943 | TAR-943 | chrX:4456558-4457264 | ff |
| 944 | TAR-944 | chrX:4463517-4464866 | ff |
| 945 | TAR-945 | chrX:4467168-4467632 | ff |
| 946 | TAR-946 | chrX:4468001-4468578 | ff |
| 947 | TAR-947 | chrX:4469643-4471347 | ff |
| 948 | TAR-948 | chrX:4472053-4472933 | ff |
| 949 | TAR-949 | chrX:4474497-4475142 | fu |
| 950 | TAR-950 | chrX:4478018-4478578 | ff |
| 951 | TAR-951 | chrX:4492146-4492552 | fu |
| 952 | TAR-952 | chrX:4496419-4497443 | ff |
| 953 | TAR-953 | chrX:4504027-4504639 | ff |
| 954 | TAR-954 | chrX:4504970-4505978 | ff |
| 955 | TAR-955 | chrX:4506724-4507143 | fu |
| 956 | TAR-956 | chrX:4525548-4526011 | ff |
| 957 | TAR-957 | chrX:4526453-4527270 | ff |
| 958 | TAR-958 | chrX:4559210-4559863 | ff |
| 959 | TAR-959 | chrX:4562407-4562963 | ff |
| 960 | TAR-960 | chrX:4571047-4571600 | ff |
| 961 | TAR-961 | chrX:4579803-4580403 | ff |
| 962 | TAR-962 | chrX:4580578-4582204 | ff |
| 963 | TAR-963 | chrX:4582493-4583761 | ff |
| 964 | TAR-964 | chrX:4584302-4584597 | fu |
| 965 | TAR-965 | chrX:4584880-4585286 | fu |
| 966 | TAR-966 | chrX:4593019-4594372 | ff |
| 967 | TAR-967 | chrX:4594587-4596134 | ff |
| 968 | TAR-968 | chrX:4596290-4596903 | fu |
| 969 | TAR-969 | chrX:4601637-4603048 | ff |
| 970 | TAR-970 | chrX:4657951-4658657 | fu |
| 971 | TAR-971 | chrX:4673159-4673810 | fu |
| 972 | TAR-972 | chrX:4680222-4680900 | fu |
| 973 | TAR-973 | chrX:4683399-4683964 | ff |
| 974 | TAR-974 | chrX:4684185-4684903 | ff |
| 975 | TAR-975 | chrX:4685994-4686656 | fu |
| 976 | TAR-976 | chrX:4686839-4687825 | ff |
| 977 | TAR-977 | chrX:4736887-4737530 | fu |
| 978 | TAR-978 | chrX:4744021-4745011 | ff |
| 979 | TAR-979 | chrX:4748621-4749568 | fu |
| 980 | TAR-980 | chrX:4751992-4753199 | ff |

|      |          |                        |    |
|------|----------|------------------------|----|
| 981  | TAR-981  | chrX:4753364-4754097   | fu |
| 982  | TAR-982  | chrX:4754294-4759539   | fu |
| 983  | TAR-983  | chrX:4759770-4760569   | fu |
| 984  | TAR-984  | chrX:4761388-4763979   | fu |
| 985  | TAR-985  | chrX:4764262-4765601   | fu |
| 986  | TAR-986  | chrX:4765950-4766661   | fu |
| 987  | TAR-987  | chrX:4784336-4785064   | ff |
| 988  | TAR-988  | chrX:4791991-4792498   | fu |
| 989  | TAR-989  | chrX:4796626-4797615   | fu |
| 990  | TAR-990  | chrX:4825731-4826462   | ff |
| 991  | TAR-991  | chrX:4828395-4829038   | fu |
| 992  | TAR-992  | chrX:4829266-4829983   | ff |
| 993  | TAR-993  | chrX:4832263-4832864   | ff |
| 994  | TAR-994  | chrX:4833051-4834092   | ff |
| 995  | TAR-995  | chrX:4846611-4847200   | ff |
| 996  | TAR-996  | chrX:4849709-4850254   | fu |
| 997  | TAR-997  | chrX:4858973-4859391   | ff |
| 998  | TAR-998  | chrX:4864713-4865437   | fu |
| 999  | TAR-999  | chrX:4880621-4881113   | ff |
| 1000 | TAR-1000 | chrX:4881846-4882401   | fu |
| 1001 | TAR-1001 | chrX:4882640-4883640   | ff |
| 1002 | TAR-1002 | chrX:4892529-4893294   | fu |
| 1003 | TAR-1003 | chrX:4895594-4896293   | fu |
| 1004 | TAR-1004 | chrX:4898040-4898659   | fu |
| 1005 | TAR-1005 | chrX:4914092-4914500   | fu |
| 1006 | TAR-1006 | chrX:4924359-4924802   | fu |
| 1007 | TAR-1007 | chrX:4932173-4932584   | df |
| 1008 | TAR-1008 | chrX:4933126-4933801   | dd |
| 1009 | TAR-1009 | chrX:4934765-4935579   | dd |
| 1010 | TAR-1010 | chrX:4938459-4939501   | dd |
| 1011 | TAR-1011 | chrX:4942112-4942880   | fu |
| 1012 | TAR-1012 | chrX:4958993-4959381   | ff |
| 1013 | TAR-1013 | chrX:5274926-5275446   | fu |
| 1014 | TAR-1014 | chrX:5289308-5289901   | fu |
| 1015 | TAR-1015 | chrX:23734281-23734858 | ff |
| 1016 | TAR-1016 | chrX:24264883-24265677 | fu |
| 1017 | TAR-1017 | chrX:24510164-24510598 | ff |
| 1018 | TAR-1018 | chrX:24516233-24517044 | ff |
| 1019 | TAR-1019 | chrX:24521290-24522056 | ff |
| 1020 | TAR-1020 | chrX:24617344-24618530 | ff |
| 1021 | TAR-1021 | chrX:24623015-24624010 | ff |
| 1022 | TAR-1022 | chrX:25165730-25166511 | fu |
| 1023 | TAR-1023 | chrX:25170485-25171271 | fu |

|      |          |                        |    |
|------|----------|------------------------|----|
| 1024 | TAR-1024 | chrX:25283176-25283610 | ff |
| 1025 | TAR-1025 | chrX:25334674-25335714 | ff |
| 1026 | TAR-1026 | chrX:25551216-25552297 | ff |
| 1027 | TAR-1027 | chrX:25557010-25558008 | ff |
| 1028 | TAR-1028 | chrX:26452387-26453534 | fu |
| 1029 | TAR-1029 | chrX:26595280-26595889 | ff |
| 1030 | TAR-1030 | chrX:26638045-26638976 | ff |
| 1031 | TAR-1031 | chrX:26642528-26643871 | ff |
| 1032 | TAR-1032 | chrX:26698510-26699505 | ff |
| 1033 | TAR-1033 | chrX:26703988-26705174 | ff |
| 1034 | TAR-1034 | chrX:26915901-26916335 | ff |
| 1035 | TAR-1035 | chrX:26921970-26922781 | ff |
| 1036 | TAR-1036 | chrX:26927029-26927795 | ff |
| 1037 | TAR-1037 | chrX:27000291-27000707 | ff |
| 1038 | TAR-1038 | chrX:27047368-27048179 | ff |
| 1039 | TAR-1039 | chrX:27052161-27053078 | ff |
| 1040 | TAR-1040 | chrX:27121888-27122690 | ff |
| 1041 | TAR-1041 | chrX:27123245-27123980 | ff |
| 1042 | TAR-1042 | chrX:27131240-27131791 | ff |
| 1043 | TAR-1043 | chrX:27268853-27269664 | ff |
| 1044 | TAR-1044 | chrX:27273890-27274656 | ff |
| 1045 | TAR-1045 | chrX:27354784-27355200 | ff |
| 1046 | TAR-1046 | chrX:27403399-27404491 | ff |
| 1047 | TAR-1047 | chrX:27408470-27409387 | ff |
| 1048 | TAR-1048 | chrX:27475379-27476294 | ff |
| 1049 | TAR-1049 | chrX:27476607-27477342 | ff |
| 1050 | TAR-1050 | chrX:27480732-27481918 | ff |
| 1051 | TAR-1051 | chrX:27484638-27485189 | ff |
| 1052 | TAR-1052 | chrX:27488924-27489655 | ff |
| 1053 | TAR-1053 | chrX:27511716-27512411 | ff |
| 1054 | TAR-1054 | chrX:27525167-27526228 | ff |
| 1055 | TAR-1055 | chrX:27609544-27609978 | ff |
| 1056 | TAR-1056 | chrX:27615612-27616423 | ff |
| 1057 | TAR-1057 | chrX:27685102-27685711 | ff |
| 1058 | TAR-1058 | chrX:27727919-27728850 | ff |
| 1059 | TAR-1059 | chrX:27732894-27733741 | ff |
| 1060 | TAR-1060 | chrX:27788378-27789373 | ff |
| 1061 | TAR-1061 | chrX:27793856-27795042 | ff |
| 1062 | TAR-1062 | chrX:27923817-27924251 | ff |
| 1063 | TAR-1063 | chrX:27929884-27930695 | ff |
| 1064 | TAR-1064 | chrX:27934954-27935720 | ff |
| 1065 | TAR-1065 | chrX:28008267-28008683 | ff |
| 1066 | TAR-1066 | chrX:28055342-28056153 | ff |

|      |          |                        |    |
|------|----------|------------------------|----|
| 1067 | TAR-1067 | chrX:28060126-28061043 | ff |
| 1068 | TAR-1068 | chrX:28129645-28130447 | ff |
| 1069 | TAR-1069 | chrX:28131002-28131737 | ff |
| 1070 | TAR-1070 | chrX:28139015-28139566 | ff |
| 1071 | TAR-1071 | chrX:28276644-28277455 | ff |
| 1072 | TAR-1072 | chrX:28281722-28282488 | ff |
| 1073 | TAR-1073 | chrX:28355033-28355449 | ff |
| 1074 | TAR-1074 | chrX:28403928-28404739 | ff |
| 1075 | TAR-1075 | chrX:28408718-28409635 | ff |
| 1076 | TAR-1076 | chrX:28475641-28476556 | ff |
| 1077 | TAR-1077 | chrX:28476869-28477604 | ff |
| 1078 | TAR-1078 | chrX:28480994-28482180 | ff |
| 1079 | TAR-1079 | chrX:28484889-28485440 | ff |
| 1080 | TAR-1080 | chrX:28489175-28489906 | ff |
| 1081 | TAR-1081 | chrX:28511946-28512641 | ff |
| 1082 | TAR-1082 | chrX:28903727-28904913 | ff |
| 1083 | TAR-1083 | chrX:28908301-28909036 | ff |
| 1084 | TAR-1084 | chrX:28909349-28910393 | ff |
| 1085 | TAR-1085 | chrX:28979627-28980544 | ff |
| 1086 | TAR-1086 | chrX:28984526-28985337 | ff |
| 1087 | TAR-1087 | chrX:29031953-29032369 | ff |
| 1088 | TAR-1088 | chrX:29104936-29105702 | ff |
| 1089 | TAR-1089 | chrX:29109942-29110753 | ff |
| 1090 | TAR-1090 | chrX:29116391-29116825 | ff |
| 1091 | TAR-1091 | chrX:29247603-29248789 | ff |
| 1092 | TAR-1092 | chrX:29253175-29254272 | ff |
| 1093 | TAR-1093 | chrX:29315742-29317095 | ff |
| 1094 | TAR-1094 | chrX:29320646-29321637 | ff |
| 1095 | TAR-1095 | chrX:29369389-29369805 | ff |
| 1096 | TAR-1096 | chrX:29373514-29374123 | fu |
| 1097 | TAR-1097 | chrX:29465406-29466217 | ff |
| 1098 | TAR-1098 | chrX:29471851-29472285 | ff |
| 1099 | TAR-1099 | chrX:29580087-29580638 | ff |
| 1100 | TAR-1100 | chrX:29583353-29584540 | ff |
| 1101 | TAR-1101 | chrX:29587927-29588662 | ff |
| 1102 | TAR-1102 | chrX:29588975-29589890 | ff |
| 1103 | TAR-1103 | chrX:29686786-29687202 | ff |
| 1104 | TAR-1104 | chrX:29757498-29758429 | ff |
| 1105 | TAR-1105 | chrX:29762508-29763355 | ff |
| 1106 | TAR-1106 | chrX:29829394-29830309 | ff |
| 1107 | TAR-1107 | chrX:29830622-29831362 | ff |
| 1108 | TAR-1108 | chrX:29834755-29835942 | ff |
| 1109 | TAR-1109 | chrX:29838656-29839207 | ff |

|      |          |                        |    |
|------|----------|------------------------|----|
| 1110 | TAR-1110 | chrX:29842943-29843674 | ff |
| 1111 | TAR-1111 | chrX:29861547-29862242 | ff |
| 1112 | TAR-1112 | chrX:29874995-29876056 | ff |
| 1113 | TAR-1113 | chrX:29959395-29959829 | ff |
| 1114 | TAR-1114 | chrX:29965463-29966274 | ff |
| 1115 | TAR-1115 | chrX:30057570-30058179 | ff |
| 1116 | TAR-1116 | chrX:30100310-30101301 | ff |
| 1117 | TAR-1117 | chrX:30104850-30106193 | ff |
| 1118 | TAR-1118 | chrX:30213262-30214184 | ff |
| 1119 | TAR-1119 | chrX:30224725-30225354 | ff |
| 1120 | TAR-1120 | chrX:30227097-30227683 | ff |
| 1121 | TAR-1121 | chrX:30228532-30229499 | ff |
| 1122 | TAR-1122 | chrX:30229788-30231056 | ff |
| 1123 | TAR-1123 | chrX:30231542-30231892 | ff |
| 1124 | TAR-1124 | chrX:30232175-30232815 | ff |
| 1125 | TAR-1125 | chrX:30240302-30241670 | ff |
| 1126 | TAR-1126 | chrX:30241885-30242890 | fu |
| 1127 | TAR-1127 | chrX:30248953-30250311 | ff |
| 1128 | TAR-1128 | chrX:30254592-30256269 | ff |
| 1129 | TAR-1129 | chrX:30262727-30263311 | ff |
| 1130 | TAR-1130 | chrX:30263488-30263863 | fu |
| 1131 | TAR-1131 | chrX:30266291-30266856 | ff |
| 1132 | TAR-1132 | chrX:30267077-30267795 | ff |
| 1133 | TAR-1133 | chrX:30268861-30269523 | ff |
| 1134 | TAR-1134 | chrX:30269706-30270565 | ff |
| 1135 | TAR-1135 | chrX:30270880-30272126 | ff |
| 1136 | TAR-1136 | chrX:30274416-30275220 | ff |
| 1137 | TAR-1137 | chrX:30288949-30289559 | ff |
| 1138 | TAR-1138 | chrX:30294309-30294923 | fu |
| 1139 | TAR-1139 | chrX:30295621-30296626 | ff |
| 1140 | TAR-1140 | chrX:30296841-30298197 | ff |
| 1141 | TAR-1141 | chrX:30322443-30323348 | ff |
| 1142 | TAR-1142 | chrX:30323854-30324458 | ff |
| 1143 | TAR-1143 | chrX:30330162-30330815 | ff |
| 1144 | TAR-1144 | chrX:30333360-30333916 | ff |
| 1145 | TAR-1145 | chrX:30337680-30338433 | ff |
| 1146 | TAR-1146 | chrX:30340202-30340917 | ff |
| 1147 | TAR-1147 | chrX:30348678-30349406 | ff |
| 1148 | TAR-1148 | chrX:30350490-30351757 | ff |
| 1149 | TAR-1149 | chrX:30352270-30353134 | ff |
| 1150 | TAR-1150 | chrX:30355163-30355921 | fu |
| 1151 | TAR-1151 | chrX:30356108-30357519 | ff |
| 1152 | TAR-1152 | chrX:30370544-30371375 | fu |

|      |          |                        |    |
|------|----------|------------------------|----|
| 1153 | TAR-1153 | chrX:30377204-30377667 | fu |
| 1154 | TAR-1154 | chrX:30470454-30470996 | fu |
| 1155 | TAR-1155 | chrX:30476629-30477179 | fu |
| 1156 | TAR-1156 | chrX:30478973-30479358 | fu |
| 1157 | TAR-1157 | chrX:30480233-30481615 | fu |
| 1158 | TAR-1158 | chrX:30482909-30483738 | ff |
| 1159 | TAR-1159 | chrX:30494387-30494632 | du |
| 1160 | TAR-1160 | chrX:30495559-30496265 | fu |
| 1161 | TAR-1161 | chrX:30501482-30502217 | fu |
| 1162 | TAR-1162 | chrX:30502898-30503701 | fu |
| 1163 | TAR-1163 | chrX:30507769-30508137 | fu |
| 1164 | TAR-1164 | chrX:30509941-30510602 | fu |
| 1165 | TAR-1165 | chrX:30532102-30532452 | ff |
| 1166 | TAR-1166 | chrX:30533955-30536014 | ff |
| 1167 | TAR-1167 | chrX:30538311-30539088 | ff |
| 1168 | TAR-1168 | chrX:30542035-30542762 | ff |
| 1169 | TAR-1169 | chrX:30549866-30551244 | fu |
| 1170 | TAR-1170 | chrX:30558443-30559167 | ff |
| 1171 | TAR-1171 | chrX:30566039-30567072 | ff |
| 1172 | TAR-1172 | chrX:30567990-30568477 | fu |
| 1173 | TAR-1173 | chrX:30593151-30594504 | ff |
| 1174 | TAR-1174 | chrX:30595352-30596266 | fu |
| 1175 | TAR-1175 | chrX:30596422-30597036 | ff |
| 1176 | TAR-1176 | chrX:30601825-30603192 | ff |
| 1177 | TAR-1177 | chrX:30607420-30609120 | ff |
| 1178 | TAR-1178 | chrX:30615546-30616610 | ff |
| 1179 | TAR-1179 | chrX:30619125-30619690 | ff |
| 1180 | TAR-1180 | chrX:30619911-30620629 | ff |
| 1181 | TAR-1181 | chrX:30621717-30622344 | fu |
| 1182 | TAR-1182 | chrX:30622562-30623427 | ff |
| 1183 | TAR-1183 | chrX:30623678-30624998 | ff |
| 1184 | TAR-1184 | chrX:30626533-30628067 | ff |
| 1185 | TAR-1185 | chrX:30630064-30630636 | fu |
| 1186 | TAR-1186 | chrX:30635936-30637017 | ff |
| 1187 | TAR-1187 | chrX:30643124-30643651 | fu |
| 1188 | TAR-1188 | chrX:30700383-30701416 | ff |
| 1189 | TAR-1189 | chrX:30702314-30702801 | fu |
| 1190 | TAR-1190 | chrX:30727445-30729488 | ff |
| 1191 | TAR-1191 | chrX:30729665-30730579 | fu |
| 1192 | TAR-1192 | chrX:30730735-30731349 | ff |
| 1193 | TAR-1193 | chrX:30981264-30982781 | ff |
| 1194 | TAR-1194 | chrX:30987395-30988634 | ff |
| 1195 | TAR-1195 | chrX:30995062-30995646 | ff |

|      |          |                        |    |
|------|----------|------------------------|----|
| 1196 | TAR-1196 | chrX:30995823-30996538 | ff |
| 1197 | TAR-1197 | chrX:30998579-30999144 | ff |
| 1198 | TAR-1198 | chrX:31000994-31001801 | fu |
| 1199 | TAR-1199 | chrX:31002061-31002851 | fu |
| 1200 | TAR-1200 | chrX:31003626-31004405 | ff |
| 1201 | TAR-1201 | chrX:31005967-31007498 | ff |
| 1202 | TAR-1202 | chrX:31013720-31014247 | fu |
| 1203 | TAR-1203 | chrX:31015310-31016482 | ff |
| 1204 | TAR-1204 | chrX:31016896-31017580 | fu |
| 1205 | TAR-1205 | chrX:31023206-31023653 | ff |
| 1206 | TAR-1206 | chrX:31028334-31029360 | ff |
| 1207 | TAR-1207 | chrX:31035943-31036559 | ff |
| 1208 | TAR-1208 | chrX:31038340-31039083 | ff |
| 1209 | TAR-1209 | chrX:31051008-31051905 | ff |
| 1210 | TAR-1210 | chrX:31057434-31057897 | fu |
| 1211 | TAR-1211 | chrX:31058331-31059378 | fu |
| 1212 | TAR-1212 | chrX:31061398-31062290 | ff |
| 1213 | TAR-1213 | chrX:31067472-31068133 | fu |
| 1214 | TAR-1214 | chrX:31075585-31075935 | ff |
| 1215 | TAR-1215 | chrX:31076478-31078996 | ff |
| 1216 | TAR-1216 | chrX:31081298-31083303 | ff |
| 1217 | TAR-1217 | chrX:31084550-31085118 | fu |
| 1218 | TAR-1218 | chrX:31088855-31089161 | fu |
| 1219 | TAR-1219 | chrX:31090250-31090614 | fu |
| 1220 | TAR-1220 | chrX:31103738-31104447 | fu |
| 1221 | TAR-1221 | chrX:31104781-31105555 | fu |
| 1222 | TAR-1222 | chrX:31126863-31127077 | fu |
| 1223 | TAR-1223 | chrX:31129047-31129369 | fu |
| 1224 | TAR-1224 | chrX:31131108-31131955 | fu |
| 1225 | TAR-1225 | chrX:31132280-31133791 | fu |
| 1226 | TAR-1226 | chrX:31134458-31135131 | ff |
| 1227 | TAR-1227 | chrX:31187953-31188491 | fu |
| 1228 | TAR-1228 | chrX:31201089-31201446 | fu |
| 1229 | TAR-1229 | chrX:31201985-31202660 | ff |
| 1230 | TAR-1230 | chrX:31203486-31204454 | ff |
| 1231 | TAR-1231 | chrX:31204653-31205118 | fu |
| 1232 | TAR-1232 | chrX:31205290-31205890 | ff |
| 1233 | TAR-1233 | chrX:31207656-31208262 | ff |
| 1234 | TAR-1234 | chrX:31215383-31215683 | fu |
| 1235 | TAR-1235 | chrX:31216770-31217126 | fu |
| 1236 | TAR-1236 | chrX:31221948-31222698 | ff |
| 1237 | TAR-1237 | chrX:31226464-31226952 | fu |
| 1238 | TAR-1238 | chrX:31235927-31236531 | fu |



|      |          |                        |    |
|------|----------|------------------------|----|
| 1239 | TAR-1239 | chrX:31237215-31237946 | ff |
| 1240 | TAR-1240 | chrX:31251613-31252240 | fu |
| 1241 | TAR-1241 | chrX:31432061-31432527 | ff |
| 1242 | TAR-1242 | chrX:31438489-31439173 | ff |
| 1243 | TAR-1243 | chrX:31456113-31457081 | ff |
| 1244 | TAR-1244 | chrX:31465462-31466347 | ff |
| 1245 | TAR-1245 | chrX:31467642-31468250 | fu |
| 1246 | TAR-1246 | chrX:31471553-31471971 | fu |
| 1247 | TAR-1247 | chrX:31532536-31533698 | fu |
| 1248 | TAR-1248 | chrX:31537542-31537989 | ff |
| 1249 | TAR-1249 | chrX:31542698-31543721 | ff |
| 1250 | TAR-1250 | chrX:31550323-31550940 | fu |
| 1251 | TAR-1251 | chrX:31552719-31553429 | ff |
| 1252 | TAR-1252 | chrX:31564039-31564848 | du |
| 1253 | TAR-1253 | chrX:31565143-31566236 | ff |
| 1254 | TAR-1254 | chrX:31572576-31573319 | ff |
| 1255 | TAR-1255 | chrX:31588984-31589341 | fu |
| 1256 | TAR-1256 | chrX:31589880-31590555 | ff |
| 1257 | TAR-1257 | chrX:31591381-31592349 | ff |
| 1258 | TAR-1258 | chrX:31592548-31593013 | fu |
| 1259 | TAR-1259 | chrX:31593185-31593785 | ff |
| 1260 | TAR-1260 | chrX:31595551-31596157 | ff |
| 1261 | TAR-1261 | chrX:31603278-31603578 | fu |
| 1262 | TAR-1262 | chrX:31604665-31605021 | fu |
| 1263 | TAR-1263 | chrX:31609843-31610593 | ff |
| 1264 | TAR-1264 | chrX:31614359-31614847 | fu |
| 1265 | TAR-1265 | chrX:31639508-31640135 | fu |
| 1266 | TAR-1266 | chrX:31654022-31654765 | ff |
| 1267 | TAR-1267 | chrX:31655199-31655662 | ff |
| 1268 | TAR-1268 | chrX:31661226-31662319 | ff |
| 1269 | TAR-1269 | chrX:31683482-31684498 | fu |
| 1270 | TAR-1270 | chrX:31684798-31685443 | ff |
| 1271 | TAR-1271 | chrX:31687307-31687923 | ff |
| 1272 | TAR-1272 | chrX:31694515-31695472 | ff |
| 1273 | TAR-1273 | chrX:31700258-31700705 | fu |
| 1274 | TAR-1274 | chrX:31709672-31710199 | fu |
| 1275 | TAR-1275 | chrX:31716418-31717055 | ff |
| 1276 | TAR-1276 | chrX:31719289-31720412 | ff |
| 1277 | TAR-1277 | chrX:31720671-31722375 | ff |
| 1278 | TAR-1278 | chrX:31723443-31723861 | fu |
| 1279 | TAR-1279 | chrX:31724382-31724947 | ff |
| 1280 | TAR-1280 | chrX:31727345-31728481 | ff |
| 1281 | TAR-1281 | chrX:31741637-31742858 | ff |

|      |          |                        |    |
|------|----------|------------------------|----|
| 1282 | TAR-1282 | chrX:31747583-31748994 | ff |
| 1283 | TAR-1283 | chrX:31765363-31765769 | fu |
| 1284 | TAR-1284 | chrX:31766887-31768155 | ff |
| 1285 | TAR-1285 | chrX:31768444-31769411 | ff |
| 1286 | TAR-1286 | chrX:31779046-31779599 | ff |
| 1287 | TAR-1287 | chrX:31784123-31785121 | ff |
| 1288 | TAR-1288 | chrX:31786903-31787656 | ff |
| 1289 | TAR-1289 | chrX:31791421-31791909 | ff |
| 1290 | TAR-1290 | chrX:31835731-31837142 | ff |
| 1291 | TAR-1291 | chrX:31841366-31843086 | ff |
| 1292 | TAR-1292 | chrX:31849454-31850038 | ff |
| 1293 | TAR-1293 | chrX:31850217-31850803 | ff |
| 1294 | TAR-1294 | chrX:31853775-31854493 | ff |
| 1295 | TAR-1295 | chrX:31855550-31856212 | ff |
| 1296 | TAR-1296 | chrX:31856831-31857713 | ff |
| 1297 | TAR-1297 | chrX:31859334-31860806 | ff |
| 1298 | TAR-1298 | chrX:31862796-31863353 | ff |
| 1299 | TAR-1299 | chrX:31866640-31867350 | ff |
| 1300 | TAR-1300 | chrX:31867510-31868394 | ff |
| 1301 | TAR-1301 | chrX:31872618-31874029 | ff |
| 1302 | TAR-1302 | chrX:31878771-31879385 | fu |
| 1303 | TAR-1303 | chrX:31879541-31880458 | fu |
| 1304 | TAR-1304 | chrX:31880635-31881091 | fu |
| 1305 | TAR-1305 | chrX:31881247-31882673 | ff |
| 1306 | TAR-1306 | chrX:31916196-31917332 | fu |
| 1307 | TAR-1307 | chrX:31924647-31925537 | ff |
| 1308 | TAR-1308 | chrX:31927635-31928363 | ff |
| 1309 | TAR-1309 | chrX:31931226-31931952 | ff |
| 1310 | TAR-1310 | chrX:31934344-31936427 | ff |
| 1311 | TAR-1311 | chrX:31936610-31937636 | ff |
| 1312 | TAR-1312 | chrX:31945723-31946393 | ff |
| 1313 | TAR-1313 | chrX:31956028-31956492 | fu |
| 1314 | TAR-1314 | chrX:31959691-31960309 | fu |
| 1315 | TAR-1315 | chrX:31965057-31965806 | fu |
| 1316 | TAR-1316 | chrX:31974741-31975814 | ff |
| 1317 | TAR-1317 | chrX:31976027-31976977 | ff |
| 1318 | TAR-1318 | chrX:31977518-31977943 | ff |
| 1319 | TAR-1319 | chrX:31993421-31994350 | ff |
| 1320 | TAR-1320 | chrX:32007083-32007625 | fu |
| 1321 | TAR-1321 | chrX:32033309-32033963 | ff |
| 1322 | TAR-1322 | chrX:32034477-32035139 | fu |
| 1323 | TAR-1323 | chrX:32036191-32036862 | fu |
| 1324 | TAR-1324 | chrX:32039888-32040503 | ff |

|      |          |                        |    |
|------|----------|------------------------|----|
| 1325 | TAR-1325 | chrX:32068438-32069502 | ff |
| 1326 | TAR-1326 | chrX:32073639-32074146 | fu |
| 1327 | TAR-1327 | chrX:32088681-32089513 | fu |
| 1328 | TAR-1328 | chrX:32090007-32090535 | fu |
| 1329 | TAR-1329 | chrX:32093433-32097160 | fu |
| 1330 | TAR-1330 | chrX:32097387-32098279 | fu |
| 1331 | TAR-1331 | chrX:32098520-32100202 | fu |
| 1332 | TAR-1332 | chrX:32100765-32102669 | fu |
| 1333 | TAR-1333 | chrX:32104208-32107359 | fu |
| 1334 | TAR-1334 | chrX:32114323-32114903 | fu |
| 1335 | TAR-1335 | chrX:32115207-32116008 | fu |
| 1336 | TAR-1336 | chrX:32120949-32121587 | fu |
| 1337 | TAR-1337 | chrX:32121751-32122635 | ff |
| 1338 | TAR-1338 | chrX:32126863-32127177 | fu |
| 1339 | TAR-1339 | chrX:32127556-32128273 | ff |
| 1340 | TAR-1340 | chrX:32132991-32133607 | ff |
| 1341 | TAR-1341 | chrX:32135480-32136895 | ff |
| 1342 | TAR-1342 | chrX:32160663-32161092 | fu |
| 1343 | TAR-1343 | chrX:32161398-32162048 | ff |
| 1344 | TAR-1344 | chrX:32168921-32169798 | ff |
| 1345 | TAR-1345 | chrX:32171441-32172156 | ff |
| 1346 | TAR-1346 | chrX:32179670-32180398 | fu |
| 1347 | TAR-1347 | chrX:32181479-32182031 | fu |
| 1348 | TAR-1348 | chrX:32183259-32183822 | ff |
| 1349 | TAR-1349 | chrX:32186126-32186912 | fu |
| 1350 | TAR-1350 | chrX:32187099-32188511 | ff |
| 1351 | TAR-1351 | chrX:32190003-32190468 | fu |
| 1352 | TAR-1352 | chrX:32343566-32344627 | ff |
| 1353 | TAR-1353 | chrX:32357380-32358075 | fu |
| 1354 | TAR-1354 | chrX:32375948-32376679 | fu |
| 1355 | TAR-1355 | chrX:32380415-32380966 | ff |
| 1356 | TAR-1356 | chrX:32383680-32384867 | ff |
| 1357 | TAR-1357 | chrX:32388260-32389000 | ff |
| 1358 | TAR-1358 | chrX:32389313-32390228 | ff |
| 1359 | TAR-1359 | chrX:32456266-32457113 | ff |
| 1360 | TAR-1360 | chrX:32461192-32462123 | ff |
| 1361 | TAR-1361 | chrX:32510479-32510895 | ff |
| 1362 | TAR-1362 | chrX:32583892-32584658 | ff |
| 1363 | TAR-1363 | chrX:32588884-32589695 | ff |
| 1364 | TAR-1364 | chrX:32595328-32595762 | ff |
| 1365 | TAR-1365 | chrX:32724489-32725675 | ff |
| 1366 | TAR-1366 | chrX:32730063-32731160 | ff |
| 1367 | TAR-1367 | chrX:32785731-32787076 | ff |

|      |          |                          |    |
|------|----------|--------------------------|----|
| 1368 | TAR-1368 | chrX:32790635-32791446   | ff |
| 1369 | TAR-1369 | chrX:32829629-32830045   | ff |
| 1370 | TAR-1370 | chrX:32925618-32926429   | ff |
| 1371 | TAR-1371 | chrX:32932063-32932497   | ff |
| 1372 | TAR-1372 | chrX:33015828-33016889   | fu |
| 1373 | TAR-1373 | chrX:33057003-33057558   | fu |
| 1374 | TAR-1374 | chrX:51723295-51723770   | fu |
| 1375 | TAR-1375 | chrX:51996354-51996829   | fu |
| 1376 | TAR-1376 | chrX:52094044-52094519   | fu |
| 1377 | TAR-1377 | chrX:52343468-52343943   | fu |
| 1378 | TAR-1378 | chrX:53029850-53030325   | fu |
| 1379 | TAR-1379 | chrX:70409626-70410272   | fu |
| 1380 | TAR-1380 | chrX:70411878-70412774   | fu |
| 1381 | TAR-1381 | chrX:70412933-70413461   | fu |
| 1382 | TAR-1382 | chrX:72132960-72133872   | fu |
| 1383 | TAR-1383 | chrX:92122811-92123827   | ff |
| 1384 | TAR-1384 | chrX:92124270-92125162   | ff |
| 1385 | TAR-1385 | chrX:92126148-92127623   | ff |
| 1386 | TAR-1386 | chrX:92128214-92129253   | ff |
| 1387 | TAR-1387 | chrX:92130240-92132026   | ff |
| 1388 | TAR-1388 | chrX:92132223-92134076   | ff |
| 1389 | TAR-1389 | chrX:92135120-92136146   | ff |
| 1390 | TAR-1390 | chrX:92136343-92138198   | ff |
| 1391 | TAR-1391 | chrX:92138458-92140247   | ff |
| 1392 | TAR-1392 | chrX:92140690-92142296   | ff |
| 1393 | TAR-1393 | chrX:92142739-92144350   | ff |
| 1394 | TAR-1394 | chrX:92145850-92146421   | ff |
| 1395 | TAR-1395 | chrX:92147458-92148152   | ff |
| 1396 | TAR-1396 | chrX:92148912-92150541   | ff |
| 1397 | TAR-1397 | chrX:92151577-92152586   | ff |
| 1398 | TAR-1398 | chrX:92152783-92154636   | ff |
| 1399 | TAR-1399 | chrX:92155677-92156685   | ff |
| 1400 | TAR-1400 | chrX:92157126-92158754   | ff |
| 1401 | TAR-1401 | chrX:92159194-92160108   | ff |
| 1402 | TAR-1402 | chrX:92161862-92162556   | ff |
| 1403 | TAR-1403 | chrX:112127976-112128982 | fu |
| 1404 | TAR-1404 | chrX:120200588-120201209 | uf |
| 1405 | TAR-1405 | chrX:162262620-162262909 | fu |
| 1406 | TAR-1406 | chrX:166444969-166445667 | fu |
